## Mega-Fire Effect on Pyrophilous Microbes

1 **Title:** Mega-fire in Redwood Tanoak Forest Reduces Bacterial and Fungal Richness and Selects  
2 for Pyrophilous Taxa and Traits that are Phylogenetically Conserved

3

4 **Running Title:** Mega-Fire Effect on Pyrophilous Microbes

5

6 **Authors:** Dylan J. Enright<sup>1</sup>, Kerri M. Frangioso<sup>2</sup>, Kazuo Isobe<sup>3</sup>, David M. Rizzo<sup>2</sup>, Sydney I.  
7 Glassman<sup>1</sup>

8

9 **Author Affiliations:** <sup>1</sup>Department of Microbiology and Plant Pathology, University of  
10 California, 3401 Watkins Drive, Riverside, CA 92521. <sup>2</sup>Department of Plant Pathology,  
11 University of California, 1 Shields Ave, Davis, CA, 95616. <sup>3</sup>Department of Applied Biological  
12 Chemistry, Graduate School of Agricultural and Life Sciences, The University of Tokyo, 1-1-1  
13 Yayoi, Bunkyo-ku, Tokyo 113-8657.

14

15 **Corresponding author:** Sydney I. Glassman, [sydney.glassman@ucr.edu](mailto:sydney.glassman@ucr.edu), (951) 827-6727  
16 Dept. of Microbiology and Plant Pathology, University of California, Riverside, CA 92521

17

18 **Competing interests statement:** The authors declare no conflicts of interest.

19

20 **Keywords:** Soberanes Fire, Mega-fire, California Redwood, Tanoak, bacteria, fungi,  
21 pyrophilous, traits

22

23

## Mega-Fire Effect on Pyrophilous Microbes

### 24 **Abstract:**

25 Mega-fires of unprecedented size, intensity, and socio-economic impacts have surged  
26 globally due to climate change, fire suppression, and development. Soil microbiomes are critical  
27 for post-fire plant regeneration and nutrient cycling, yet how mega-fires impact the soil  
28 microbiome remains unclear. We had a serendipitous opportunity to obtain pre- and post-fire  
29 soils from the same sampling locations because the 2016 Soberanes Fire, a mega-fire burning  
30 >500 Km<sup>2</sup>, burned with high severity throughout several of our established redwood-tanoak  
31 plots. This makes our study the first to examine microbial fire response in redwood-tanoak  
32 forests. We re-sampled soils immediately post-fire from two burned plots and one unburned plot  
33 to elucidate the effect of mega-fire on soil microbiomes. We used Illumina MiSeq sequencing of  
34 16S and ITS1 to determine that both bacterial and fungal richness were reduced by 38-70% in  
35 burned plots, with richness unchanged in the unburned plot. Fire altered composition by 27% for  
36 bacteria and 24% for fungi, whereas the unburned plots experienced no change in fungal and  
37 negligible change in bacterial composition. We observed several pyrophilous taxa previously  
38 observed in Pinaceae forests, indicating that these microbes are likely general fire-responders  
39 across forest types. Further, the pyrophilous taxa that positively responded to fire were  
40 phylogenetically conserved, suggesting shared evolutionary traits. For bacteria, fire selected for  
41 increased Firmicutes and Actinobacteria. For fungi, fire selected for the Ascomycota classes  
42 Pezizomycetes and Eurotiomycetes and for a Basidiomycota class of heat-resistant  
43 Geminibasidiomycete yeasts. We hypothesize that microbes share analogous fire response to  
44 plants and propose a trait-based conceptual model of microbial response to fire that builds from  
45 Grime's Competitor-Stress tolerator-Ruderal framework (C-S-R) and its recent applications to

## Mega-Fire Effect on Pyrophilous Microbes

46 microbes. Using this framework and established literature on several microbial species, we  
47 hypothesize some generalizable principals to predict which microbial taxa will respond to fire.

48

### 49 **Introduction**

50       The rise of the mega-fire is an anthropogenic phenomenon with unknown consequences  
51 for soil microbes and ecosystem processes. In the past, most wildfires were low severity, high  
52 frequency events (Archibald et al., 2013). These low-intensity naturally occurring wildfires  
53 helped clear away dead brush, revitalize the soil with nutrient deposition from pyrolyzed  
54 material, and assist some plants (such as serotinous pines) with their reproductive cycles (He &  
55 Lamont, 2018; Keeley et al., 2011). However, rising global temperatures (Westerling et al.,  
56 2006), elongated droughts (Mukherjee et al., 2018), and development at the wildland-urban  
57 interface (Spyratos et al., 2007), have led to the rise of catastrophic mega-fires of unprecedented  
58 size, intensity, and socio-economic impacts (Stephens et al., 2014). Whereas many  
59 Mediterranean ecosystems and plants are adapted to fire and may indeed require fire to  
60 reproduce (Keeley et al., 2011), whether plants or their associated soil microbiomes will survive  
61 mega-fires remains unknown.

62       The soil microbiome is an important driver of plant diversity and productivity (Van der  
63 Heijden et al., 2008), and soil biogeochemical cycling (Crowther et al., 2019). If soil  
64 microbiomes do not survive mega-fires, then associated plants, especially those reliant on  
65 symbiotic mycorrhizal fungi, may not regenerate (Collier & Bidartondo, 2009). Ectomycorrhizal  
66 fungi (EMF) and arbuscular mycorrhizal fungi (AMF) are key partners with plant roots that  
67 increase access to soil nutrients in exchange for photosynthetically derived carbon (Brundrett &  
68 Tedersoo, 2018). Moreover, soil bacteria and fungi are primarily responsible for litter

## Mega-Fire Effect on Pyrophilous Microbes

69 decomposition (Glassman et al., 2018), nutrient cycling (Crowther et al., 2019), and soil  
70 aggregation (Lehmann et al., 2017), which are essential for ecosystem regeneration. As climate  
71 change continues to influence fire regimes with unknown consequences for ecosystem processes  
72 (Rogers et al., 2011), it is essential to determine how soil microbes that drive these processes are  
73 affected by mega-fires.

74 Previous studies have shown that while fire significantly decreases bacterial and fungal  
75 biomass (Dooley & Treseder, 2012) and richness (Pressler et al., 2019), fire is not totally  
76 sterilizing, and similar to plants (Keeley et al., 2011), some taxa respond positively and are  
77 adapted to fire. Fires are known to shift fungal dominance from Basidiomycota to Ascomycota  
78 (Cairney & Bastias, 2007; Pérez-Valera et al., 2018; Semenova-Nelsen et al., 2019), and many  
79 Ascomycetes are known to fruit in abundance after fire. Indeed, century-old studies describe  
80 “pyrophilous”, or fire loving, fungi from mushroom surveys (Seaver, 1909). Many of these  
81 pyrophilous fungi that fruit after fires are in the Ascomycete family Pyronemataceae (El-Abyad  
82 & Webster, 1968; McMullan-Fisher et al., 2011; Petersen, 1970) and heat-treated soil has  
83 recovered Ascomycetes in the genera *Aspergillus* and *Penicillium* (McGee et al., 2006; Warcup  
84 & Baker, 1963). Further, the Ascomycete *Neurospora crassa* is known to have heat activated  
85 spores (Emerson, 1948). While less common than Ascomycetes, Basidiomycetes can also  
86 respond positively to fire. For example, the Basidiomycete mushroom *Pholiota highlandensis*  
87 commonly fruits after wildfires (Raudabaugh et al., 2020), and the EMF species *Rhizopogon*  
88 *olivaceotinctus* significantly increased in frequency after a pine forest mega-fire (Glassman et al.,  
89 2016). However, less is known about the mycelial response of fungi to fire, and even less is  
90 known about bacteria, with less than 3% of studies examining microbial response to fire  
91 addressing their composition (Pressler et al., 2019). Yet, recent evidence suggests that

## Mega-Fire Effect on Pyrophilous Microbes

92 pyrophilous bacteria may also exist (Whitman et al., 2019; Woolet & Whitman, 2020). For  
93 example, several taxa of bacteria significantly increased in frequency after a boreal wildfire, in  
94 particular the Actinobacteria *Arthrobacter* and the Proteobacteria *Massilia* (Whitman et al.,  
95 2019). Currently, most research on pyrophilous microbes is observational, and as such while we  
96 know that these taxa respond positively to fire, we do not yet know why.

97         While their small size and immense diversity has limited our understanding of fire effects  
98 on microbes, trait-based approaches are providing promising avenues for synthesizing microbes  
99 into suites of traits under which selective trade-offs might occur (Lustenhouwer et al., 2020;  
100 Malik et al., 2020). Trait strategies and trait syndromes are well established in the plant world  
101 including traits for wildfire response (e.g. thick bark, serotinous cones, vegetative re-sprouting)  
102 (Keeley et al., 2011; Pausas et al., 2004). Functional traits synthesize the wide diversity of  
103 species into trait groups (e.g., seed size and specific leaf area) each of which is associated with  
104 specific strategies such as longevity or drought tolerance. Due to energetic costs or evolutionary  
105 constraints associated with different functions, it is unlikely that one organism will succeed at all  
106 strategies and, therefore, will *trade off* the ability to perform one function for a less costly  
107 alternative (Reich, 2014). Identifying traits of pyrophilous microbes and trade-offs among them  
108 can improve our ability to model biogeochemical consequences such as carbon cycling under  
109 anthropogenically induced changes to fire regimes (Malik et al., 2020). A recent study  
110 hypothesized what some broad microbial fire response traits might be (fast growers,  
111 thermotolerant structure producers, and resource acquisition of post-fire nutrients) (Whitman et  
112 al., 2019). Expanding on this framework and identifying microbes that fit into these trait  
113 syndromes in a variety of biomes will provide key insights into microbial fire ecology and  
114 improve prediction of fire biogeochemical impacts. The first step in this expansion of the

## Mega-Fire Effect on Pyrophilous Microbes

115 pyrophilous trait framework is to test the phylogenetic conservation of microbial fire response,  
116 meaning testing if more closely related organisms tend to respond to fire in the same way  
117 (Martiny et al., 2013). By comparing a clade's fire response to observations made in other fire  
118 events and in multiple ecosystems we can better predict how individual taxa will respond even if  
119 they are observed post-fire for the first time. This is because traits governing microbial  
120 phenotypic responses are often conserved within clades (Martiny et al., 2013). Thus, as the  
121 discovery of traits governing pyrophilous microbes' fire response are uncovered, the ecological  
122 role of related microbes will be better predicted in future post-fire sampling. For example,  
123 bacterial response to both nitrogen addition (Isobe et al., 2019) and simulated global climate  
124 change factors was phylogenetically conserved across all perturbations (Isobe et al., 2020),  
125 which improves prediction of disturbance response of closely related taxa.

126       Most fire studies use burned areas compared to an unburned control as a substitute for not  
127 having pre-fire data from the burned region (Brown et al., 2019; Buscardo et al., 2010; Whitman  
128 et al., 2019), laboratory heating experiments (Bruns et al., 2020; Riah-Anglet et al., 2015), or  
129 prescribed fire to examine impacts on soil microbes (Brown et al., 2013; Fujimura et al., 2005).  
130 While these all provide useful information on microbial response to fire, none of these conditions  
131 replicate the size and severity of a mega-fire. Since it is unlikely to have microbial  
132 documentation before fires occur, the study of mega-fire impacts must be opportunistic. Two  
133 such studies exist, in which pre- and post-fire soil samples from the exact same sampling  
134 locations after a stand-replacing fire were available, and both were in Pine forests, and both  
135 focused solely on EMF (Baar et al., 1999; Glassman et al., 2016). Existing research on  
136 pyrophilous taxa also focuses largely on pine forests (Dove & Hart, 2017; Pressler et al., 2019),  
137 so it is unclear whether the same pyrophilous taxa will respond in other forest types or dryland

## Mega-Fire Effect on Pyrophilous Microbes

138 ecosystems. Expanding our knowledge to non-Pinaceae forests will allow us to determine if  
139 pyrophilous taxa and their traits are generalizable or ecosystem specific.

140       The California redwood (*Sequoia sempervirens*) and tanoak (*Notholithocarpus*  
141 *densiflorus*) forest is a charismatic forest of coastal California and southern Oregon that is  
142 adapted to high fire frequency with traits including thick bark and vegetative re-sprouting (Paul  
143 Zinke, 1988; Stephens et al., 2007). Redwood-tanoak forests are also culturally significant with  
144 tanoak acorns as a staple of the Native American diet (Meyers et al., 2006). These forests are  
145 now highly threatened by both the invasive pathogen *Phytophthora ramorum*, causative agent of  
146 Sudden Oak Death (SOD), and changing fire regimes (Metz et al., 2013; Simler et al., 2018). It is  
147 possible that their associated soil microbiomes, including the AMF associated with redwoods  
148 (Afek et al., 1994) and EMF associated with tanoaks (Bergemann & Garbelotto, 2006) may help  
149 them survive these unprecedented disturbances. Yet, their wildfire response remains completely  
150 uncharacterized.

151       Here, we take advantage of the 2016 Soberanes Fire, a mega-fire burning >500 Km<sup>2</sup>,  
152 which burned through our study plots established to examine the impacts of SOD on redwood-  
153 tanoak forest microbiomes (Meentemeyer et al., 2008) (Figure 1). We were able to sample soils  
154 from two burned and one unburned plot immediately post-fire so we could assess what microbes  
155 survived the mega-fire before rain could disperse in new microbes. Because we had an unburned  
156 plot, we were able to capitalize on a before-after control impact (BACI) (Conquest, 2000)  
157 experimental design for increased inference. We thus tested the following hypotheses: H1) the  
158 mega-fire would significantly decrease bacterial, total fungal, and mycorrhizal richness in  
159 comparison to the control plot, H2) fungal composition would shift from Basidiomycete to  
160 Ascomycete dominated, and H3) pyrophilous bacterial and fungal taxa would emerge and might

## Mega-Fire Effect on Pyrophilous Microbes

161 have similarities to previously described pyrophilous taxa from pine-forests and would fit into a  
162 trait-based conceptual model based on post-fire resource acquisition, thermotolerance, or fast  
163 growth or colonization (Whitman et al 2019). Finally, we hypothesized that H4) adaptation to  
164 fire might be a phylogenetically conserved trait, as has been indicated for microbial response to  
165 nitrogen disturbance (Isobe et al., 2019).

166

### 167 **Materials and Methods**

168 *Plot Description and soil sampling scheme:* In 2006 and 2007, one hundred fourteen 500 m<sup>2</sup>  
169 circular plots were established in redwood forests across the California Big Sur region to study  
170 the effects of the emerging SOD outbreak (Meentemeyer et al., 2008). Big Sur has an average  
171 rainfall of 911mm/year, with most rain falling from October through April, and an average  
172 temperature range of 10.1°C to 16.1°C (Potter, 2016). On January 14<sup>th</sup> and February 4<sup>th</sup> 2013,  
173 soil was collected to determine soil microbial composition from a subset of those plots selected  
174 for dominance of tanoak as the only EMF host, accessibility from the road so as to keep soils on  
175 ice immediately after sampling, and similarity in slope, aspect, and elevation. We collected 12  
176 soil cores at 2,6, and 10m from the plot center in 4 cardinal directions in an attempt to adequately  
177 sample the soil microbial communities across the entire plot (Figure 1B). The top 10cm of soil  
178 was collected using field sterilized (with 70% EtOH) Bond 8050 Releasable Bulb Planters (~250  
179 mL of soil). From July 22-October 12, 2016, the Soberanes Fire burned 534 km<sup>2</sup> in Big Sur,  
180 burning with high severity throughout a significant portion of the fire including two of our plots  
181 (Potter, 2016)(Figure 1A). On the day that the fire was officially declared over (October 12,  
182 2016), we were able access and collect soil samples from the exact same sampling locations  
183 (using GIS, meter tape, and notes) in one unburned (plot 058) and two burned plots (plots 601



## Mega-Fire Effect on Pyrophilous Microbes

184 and 603). For each plot, all tree species identification, size, and dead versus alive status were  
185 geographically mapped in 2006, 2010 and 2013 (Figures S1-S3). All plots were in UTM zone 10  
186 and slopes ranged from 19-34°, elevations from 491-744m, and distances to the coast from 4.1-  
187 6.4km (Table S1).

188

189 *DNA Extraction and Storage:* Soils were stored on ice in the field and homogenized the next day  
190 using a 2mm sieve and sterilizing with 70% EtOH between samples. For DNA extraction, 0.25g  
191 of soil was weighed and placed into tubes from the MoBio Power Soil DNA Extraction Kit and  
192 stored at 4°C. DNA was extracted within the week, following manufacturer's protocols and  
193 stored at -20°C until analyzed.

194

195 *PCR Amplification of rRNA:* Bacteria and fungi were characterized using the 515F-806R primer  
196 pair to characterize the V4 region of the bacterial 16S rRNA gene (Caporaso et al., 2011) and the  
197 ITS1F-2 primer pair (White et al., 1990) adapted for Illumina MiSeq (Smith & Peay, 2014) to  
198 characterize the ITS1 region of the fungal internal transcribed spacer region (Schoch et al.,  
199 2012). PCR recipe included 1µL of template DNA (in some cases diluted 1:10 to overcome  
200 inhibitors), 2µL of each primer at 10µM concentration, 12.5µL of Accustart Toughmix  
201 (Quantabio, Beverly, MA, USA), and 7.5µL of PCR grade water for a total reaction volume of  
202 25µL. Thermocycler conditions began with denaturation at 94°C for 3 min; followed by 29  
203 amplification cycles for 16S of 45 s at 94°C, 1 min at 50°C, 90 sec at 72°C, followed by a 10-  
204 min final extension at 72°C; and for ITS: 30 s at 94°C, 30 sec at 52°C, 30 sec at 68°C, with a 10-  
205 min final extension at 68°C. A mock community (ZymoBiomics, Zymo, Irvine, CA) and  
206 negative DNA extractions and PCRs were also amplified and sequenced.

## Mega-Fire Effect on Pyrophilous Microbes

207

208 *Illumina library preparation and sequencing:* PCR products were pooled and cleaned as  
209 previously established (Glassman et al., 2018), with PCR products for 16S or ITS libraries  
210 pooled based on band strength from gel electrophoresis, using either 1 $\mu$ L, 2 $\mu$ L, or 3 $\mu$ L of the  
211 PCR product, using 3 $\mu$ L for the weakest bands and 1 $\mu$ L for the strongest. Pooled PCR products  
212 of either 16S or ITS were cleaned with AMPure magnetic beads (Beckman Coulter Inc., Brea,  
213 California, USA), quality checked for concentration and amplicon size using the Agilent 2100  
214 Bioanalyzer (Agilent Technologies, Santa Clara, CA, USA) at the Institute for Integrative  
215 Genome Biology (IIGB) at University of California, Riverside (UCR) then pooled at a 60:40 ITS  
216 to 16S ratio. The combined library was sequenced with an Illumina MiSeq 250bp paired-end run  
217 at the UCR IIGB.

218

219 *Bioinformatics and OTU Table Construction:* Demultiplexed sequences were received from the  
220 Institute for Integrative Genome Biology (IIGB) UCR core and raw reads were analyzed for  
221 quality with FastQC, and primers and barcodes were trimmed with Cutadapt v. 1.16 (Martin,  
222 2011). We then used UPARSE v11 (Edgar, 2013) to merge forward and reverse reads with  
223 fastq\_mergepairs, quality filtered with fastq\_filter with fastq\_maxee of 0.5, dereplicated  
224 sequences, removed singletons, and clustered 97% OTUs following established protocols  
225 (Glassman et al., 2018). For 16S, 5.2 million (M) reads were analyzed, 4.6M (88.6%) merged  
226 under the constraints for quality control, and 4.3M reads (94.4%) passed the filtering step at an  
227 expected error rate of 0.5. OTUs were then assigned taxonomic information using a RDP  
228 classifier and the GreenGenes database (DeSantis et al., 2006) (accessed 4/25/2019) in QIIME  
229 1.9.1 (Caporaso et al., 2010). Samples identified as mitochondria, chloroplasts, or unidentified

## Mega-Fire Effect on Pyrophilous Microbes

230 were removed, leaving a remaining 14,282 OTUs. For ITS1, 9.2M reads were analyzed, 7.5M  
231 (81%) merged, and 5.6M (75.6%) passed the filtering step. Fungal taxonomy was assigned to  
232 97% OTUs using the QIIME 1.9.1 BLAST protocol and the UNITE database (Kõljalg et al.,  
233 2005) (accessed 5/13/2019). Samples not identified as Kingdom Fungi were removed, resulting  
234 in 3,328 OTUs. Sequences were submitted to the National Center for Biotechnology Information  
235 Sequence Read Archive under BioProject accession number PRJNA659056.

236

### 237 *Data Analysis*

238 All statistical analyses and figures were produced in R 4.0.2 (R Core Team, 2020) and all  
239 scripts are available at: <https://github.com/sydneyg/SoberanesFire>. In order to accurately  
240 compare richness across samples with uneven sequencing depth, samples were rarefied to an  
241 even sequencing depth per sample (10,367 for bacteria and 12,089 for fungi) using the “rarefy”  
242 function in the Vegan R package (Oksanen, 2007). In this process negative DNA extractions and  
243 negative PCRs were removed due to low sequencing depth. Mock communities were examined  
244 and removed prior to analysis. Alpha diversity metrics were calculated with the “estimate”  
245 function (observed species, ACE and Chao1) in the BioDiversityR package (Kindt, 2019) and  
246 with the “diversity” and “exp” functions (Shannon, Simpson) in Vegan (Oksanen, 2007). ACE,  
247 Chao1 and observed Species were highly correlated for both bacteria (Figure S4 A& B) and  
248 fungi (Figure S4 B&C) so all analyses and figures are based on observed species number after  
249 rarefaction. Shannon metrics were used to detect changes in evenness and Simpson was used to  
250 detect changes in dominance. Normality was tested with a Shapiro test, then ANOVA was used  
251 to test the effect of fire versus time on bacterial and fungal richness, followed by a post-hoc  
252 Tukey HSD test. Percent reduction in species richness was computed using the average species

## Mega-Fire Effect on Pyrophilous Microbes

253 richness in each plot before and after the fire. Species accumulation curves were also constructed  
254 using “speccacum” function in Vegan (Oksanen, 2007). Richness figures were created in ggplot2  
255 (Wickham, Chang, et al., 2019).

256 We used FunGuild (Nguyen et al., 2016) to analyze the effects of fire on EMF, AMF and  
257 saprobic fungi. We applied FunGuild to the unrarefied fungal OTU table, then only included  
258 “Highly Probable” guild assignments. These OTUs were then selected from the rarefied full  
259 fungal dataset using a “semi\_join” function from the tidyverse R package (Wickham, Averick, et  
260 al., 2019), resulting in a total of 463 OTUs, including 222 EMF, 25 AMF, and 76 saprobic fungi.  
261 Changes in per guild species richness were then calculated.

262 For bacterial and fungal community composition, we calculated dissimilarity matrices as  
263 in (Glassman et al., 2018), using the “avgdist” function in Vegan (Oksanen, 2007). OTU tables  
264 were normalized by subsampling to the lowest common sampling depth 100×, then the median  
265 of the Bray–Curtis dissimilarity matrices calculated from each of subsampled OTU tables was  
266 square root transformed. We then tested the effect of time and fire on bacterial and fungal  
267 community composition with a two-way Permutational multivariate analysis of variance  
268 (PERMANOVA) (Anderson et al., 2008) as implemented with the Vegan “adonis” function. We  
269 visualized community compositional differences with nonmetric multidimensional scaling  
270 (NMDS) with the Vegan “metaMDS” function and used the Vegan “envfit” function to  
271 determine which taxa correlated well with ordination space, correcting for multiple tests with a  
272 Benjamini-Hochberg correction.

273 We identified pyrophilous taxa with four approaches. First, we identified taxa that  
274 correlated well with ordination space with “envfit” as described above. Second, we calculated  
275 percent changes in sequence abundance of dominant taxa (over 1% sequence abundant) before

## Mega-Fire Effect on Pyrophilous Microbes

276 and after fire in the burned plots and visualized the most abundant taxa summarized by genera  
277 with rank abundance curves. Third, we used indicator species analysis (ISA) to identify  
278 microbial indicators in the burned plots before and after the fire using the “multipatt” function in  
279 the Indicspecies package (Cáceres & Jansen, 2019). Finally, we ran the raw OTU tables through  
280 DESeq2 (Love et al., 2019) to identify log-fold changes in abundance of each OTU in the burned  
281 plots before and after fire. We then used the DESeq2 output to determine if the taxa that  
282 positively or negatively responded to fire were phylogenetically conserved using established  
283 protocols (Isobe et al., 2019). In brief, we created circular phylogenies using maximum  
284 likelihood trees using the RAxML pipeline (Stamatakis, 2014) for 16S and ITS1 and then  
285 assigned each OTU a positive or negative response to fire based on the DESeq2 analysis. Then  
286 the tree was examined for the deepest node at which >90% of the OTUs shared the same  
287 response (positive or negative). These groups were then binned into consensus clades and the  
288 mean depth of the consensus clades was calculated with consenTRAIT (Martiny et al., 2013) as  
289 implemented with the Castor “get\_trait\_depth” function using 1,000 permutations. The  
290 consensus clades were then mapped onto the phylogeny and colored to visualize evolutionary  
291 relationships of taxa exhibiting positive or negative responses to fire using the Interactive Tree of  
292 Life (ITOL) (Letunic & Bork, 2007). The taxonomy of clades whose response was significantly  
293 more positive or negative than expected by chance was identified with a two-tailed exact test  
294 (Mc. Donald, 2015) against the equal distribution of positive and negative responses within each  
295 taxonomic group. Because of some of the known issues with using ITS for phylogenetic analyses  
296 an attempt to strengthen our phylogeny using GhostTree (Fouquier et al., 2016) was made.  
297 However, due to the inherent bias towards EMF in the GhostTree backbone phylogenies,  
298 aligning our OTUs to GhostTree resulted in the loss of 61.4% of OTUs despite multiple attempts

## Mega-Fire Effect on Pyrophilous Microbes

299 to correct for this, thus rendering the GhostTree derived phylogenies not suitable for our  
300 analyses. Therefore, we decided to move forward with ITS based analysis under the guiding  
301 principle that the trends and clustering observed in our analysis, supported by literature and our  
302 other analyses, are still meaningful despite the potential weakening of statistical conclusions due  
303 to the limitations of ITS.

304

### 305 **Results**

306 *Change in Microbial Richness After Fire:* After rarefaction, we found a total of 12,322 bacterial  
307 and 2,878 fungal OTUs. In the burned plots (Plots 601 and 603), we found 9,116 bacterial and  
308 1,869 fungal OTUs pre-fire, and 6,172 bacterial and 987 fungal OTUs post-fire. Fire  
309 significantly reduced both bacterial and fungal observed species richness in the burned plots,  
310 whereas richness remained unchanged in the unburned plot (Figure 2). Results did not differ if  
311 we treated samples independently ( $F_{1,44} = 23.75$ ,  $p < 0.001$ ,) versus if we counted them as nested  
312 within plots ( $F_{1,1} = 65.73$ ,  $p < 0.001$ ,). For both bacteria and fungi, number of observed taxa  
313 decreased in plot 601 by approximately 40% (37.6% for fungi and 40.1% for bacteria). In plot  
314 603, bacterial richness declined by 52.2% and fungal richness declined by a whopping 70%. This  
315 is in contrast to the unburned plot (058) which had equivalent richness to the burned plots 601  
316 and 603 pre-fire but experienced no change in either bacterial or fungal richness during the three  
317 years (Figure 2; Table S2). Fire also resulted in large and significant evenness reductions  
318 (Shannon diversity index decreased by 82-83% for fungi and 65-78% for bacteria) and large  
319 increases in dominance in the burned plots (measured as the inverse of Simpson's index  
320 (Whittaker, 1965), which increased by 71-78% for fungi and by 76-82% for bacteria) with no  
321 significant change in either index for the unburned plot (Table S2). EMF richness decreased by

## Mega-Fire Effect on Pyrophilous Microbes

322 68% in one burned plot (plot 603), was unchanged in the other burned plot, but increased by  
323 26% over the 3-year time span in the unburned plot (Figure S5). AMF and saprobic richness both  
324 decreased in burned plots (saprobes: 69% in plot 601 and 76% in plot 603; AMF: 60% in plot  
325 601 and 80% in plot 603) and both increased in the unburned plot over time (saprobes: 24%;  
326 AMF: 83%; Figure S5).

327

328 *Change in Microbial Composition After Fire:* Fire resulted in a large and significant change in  
329 bacterial (Adonis  $R^2 = 0.27$ ,  $p < 0.001$ ) and fungal (Adonis  $R^2 = 0.24$ ,  $p < 0.001$ ) community  
330 composition, while the unburned plot experienced no change in fungal composition and a small  
331 change in bacterial composition ( $R^2 = 0.09$ ,  $p < 0.01$ ; Figure 3, Figure S6). Compositional  
332 changes in bacteria were largely driven by increases in the Actinobacteria and Firmicutes phyla  
333 post-fire and decreases in the Proteobacteria, Gemmatimonadetes, Verrumicrobia, Chloroflexi,  
334 Elusimicrobia, Planctomycetes, Acidobacteria, Bacteroidetes, and Saccharibacteria phyla (Figure  
335 3B). Compositional changes in fungi were driven by large increases in the Basidiomycete genus  
336 *Basidioascus* and the Ascomycete genus *Penicillium* and decreases in the Mucoromycota genus  
337 *Mortierella*, and the Ascomycete genera *Ilyonectria*, *Metarhizium*, *Cladophialphora*, *Pectenia*,  
338 *Humicola*, and *Exophiala* (Figure 3D).

339

340 *Change in Relative Sequence Abundance of Bacterial Taxa After Fire:* Pre-fire, bacterial OTUs  
341 dominating ( $\geq 1\%$  of sequence abundance) the burned plots were primarily Proteobacteria  
342 (84.4%) and Acidobacteria (15.6%) with the most dominant taxa, Proteobacteria species in  
343 *Bradyrhizobium* and *Rhodoplanes*, occupying around 2.3% sequences each (Figure 4A; Table  
344 S3). Post-fire, there was a shift in the dominant phyla ( $\geq 1\%$  total sequences), with a loss of

## Mega-Fire Effect on Pyrophilous Microbes

345 Proteobacteria and a dominance of Firmicutes (82%) and Actinobacteria (18%). The most  
346 abundant taxon also had an increase in dominance, a Firmicute in the genus *Sporosarcina*,  
347 dominating 6.9% of the sequences, followed by Firmicutes genera *Fictibacillus*,  
348 *Thermoflavimicrobium*, *Bacillus*, *Solibacillus*, *Cohnella*, and Actinobacteria genera  
349 *Micromonospora*, *Pseudonocardia*, and the family Micromonosporaceae (Figure 4A).  
350  
351 *Change in Relative Sequence Abundance of Fungal Taxa After Fire: Pre-fire, fungal taxa  $\geq 1\%$*   
352 *sequence abundance were dominated 62% by the phylum Basidiomycota, followed by 25%*  
353 *Mucoromycota, 10% to Ascomycota, and 3% unidentifiable to phylum (Figure 4B; Table S4).*  
354 *Pre-fire, the most dominant fungi were the Basidiomycete *Hygrocybe acutoconica* (5.94%) and*  
355 *the Mucoromycete *Mortierella baineri* (4.62%). Post-fire, among the most abundant taxa,*  
356 *Ascomycota dominated (65%), with Basidiomycota falling to 35%, and a complete loss of the*  
357 *Mucoromycota. There was also a large increase in dominance with the most abundant taxon*  
358 *post-fire, a Basidiomycete Geminibasidiomycete yeast *Basidioascus undulatus*, accounting for*  
359 *28% of the sequences (Figure 4B). The other top taxa were dominated by genera in the*  
360 *Ascomycota *Penicillium* 13.1% and *Fusarium* 1.2% and the family Pyronemataceae (*Tricharina**  
361 *13.6%, *Peziza* 10.2%, *Anthracobia* 7.6%, *Scutellina* 7.2%, *Pyronema* 4.2%).*  
362  
363 *Bacterial indicator species: Bacterial indicator species analysis (ISA) revealed 86 indicator*  
364 *OTUs shared between the burned plots pre-fire, and 21 OTUs indicative of the post-fire*  
365 *community (Table S5). The top ten taxa identified for the post-fire grouping were two OTUs*  
366 *from the Firmicutes family Thermoactinomycetaceae, one OTU from the Actinobacteria family*



## Mega-Fire Effect on Pyrophilous Microbes

367 Thermomonosporaceae, OTUs from the Firmicutes genera *Thermoflavimicrobium*, *Fictibiacillus*,  
368 *Cohnella*, *Paenibacillus*, *Bacillus*, *Tepidibacterium*, and the Actinobacteria genus *Streptomyces*.

369

370 *Fungal indicators species*: Fungal ISA identified 13 indicator taxa for the burned plots pre-fire  
371 and 5 indicator taxa post-fire (Table S6). The 13 pre-fire taxa identified were 4 species from the  
372 Mucoromycota genus *Mortierella* and the rest Ascomycetes belonging to the genera *Polyphilus*,  
373 *Pycnopeziza*, *Thelonectria*, *Pectenia*, *Cladophialophora*, and *Phomopsis*. The five fungal  
374 indicators of the post-fire group were all Ascomycetes, one in the Aspergillaceae, *Penicillium*  
375 *decumbens*, and the rest in the Pyronemataceae: *Anthracobia* sp., *Geopyxis alpina*, *Peziza*  
376 *vacinii*, and *Tricharina praecox*.

377

378 *Phylogenetic conservation of pyrophilous taxa*: Lineages of both bacteria and fungi that  
379 negatively or positively respond to fire appear to be phylogenetically conserved at the class level  
380 for fungi and the phylum level for bacteria (Figures 5 & 6). There is strong clustering of bacteria  
381 positively responding to fire in the Firmicutes and Actinobacteria and a few positive responders  
382 in the Acidobacteria (Figure 5; Table S7). All other phyla belonged to consensus clades that  
383 either did not show the patterned response to fire or responded negatively. For fungi, the lineages  
384 that positively respond to fire include the Ascomycete class Pezizomycetes (containing  
385 Pyronemataceae) and the Basidiomycete class Geminibasidiomycetes (containing *Basidioascus*)  
386 (Figure 6; Table S8). There are also positive interactions sprinkled within some of the other  
387 classes, which appear to be conserved at the order level rather than class level, namely the  
388 Eurotiomycetes order Eurotiales (contains Aspergillaceae) and the Agaricomycete order

## Mega-Fire Effect on Pyrophilous Microbes

389 Russulales. All other groups belonged to consensus clades that responded negatively or did not  
390 show the phylogenetic patterned response.

391

### 392 **Discussion**

393 Here, we take advantage of the 2016 Soberanes Fire burning through our plots and show  
394 for the first time the effects of a mega-fire on bacterial and fungal communities with a rare pre-  
395 and post-fire dataset in a redwood tanoak forest. In accordance with our hypotheses, the mega-  
396 fire significantly decreased bacterial and fungal richness (H1) (Figure 2); fungal composition  
397 shifted from Basidiomycete to Ascomycete dominated (H2) (Figure 4); many pyrophilous taxa  
398 previously identified from other biomes appeared in a redwood tanoak forest and are likely  
399 generalizable and may fall into trait categories analogous to plants (H3); and adaptation to fire is  
400 likely a phylogenetically conserved trait across bacteria (Figure 5) and fungi (Figure 6) (H4).

401 We found that the mega-fire led to large and significant reductions in bacterial and fungal  
402 richness. Reduction in microbial richness is a typical result after fire (Brown et al., 2019; Day et  
403 al., 2019; Pérez-Valera et al., 2018; Whitman et al., 2019), however the degree to which fire  
404 affects richness varies. In our study, fire reduced the average species richness per sample by up  
405 to 52% for bacteria and up to 70% for fungi (Figure 2). In contrast, a meta-analysis of fungal  
406 response to fire found an average richness reduction of 28% (Dove & Hart, 2017). However, the  
407 range for both fungal (12-80%) (Brown et al., 2019; Pulido-Chavez et al., 2021) and bacterial  
408 (20-58%) (Brown et al., 2013; Pérez-Valera et al., 2018) richness reduction can be quite large.  
409 This is likely due to differences in fire severity, which is often not measured or consistently  
410 reported in post-fire microbial surveys, despite that more severe fires have been shown to have  
411 greater impacts on the soil community (Whitman et al., 2019). Moreover, when reported, it is

## Mega-Fire Effect on Pyrophilous Microbes

412 based on plant mortality measured at coarse levels (30km<sup>2</sup> in the case of the Soberanes Fire)  
413 (Potter, 2016) that do not correspond well to the scale of the soil core and can lead to wide  
414 disparities in the presence or absence of live plants, duff, or ash in soil cores all taken in high  
415 severity defined fire zones. We also found that EMF richness declined following fire, which  
416 makes sense given large host mortality, and is in accordance with other high severity fires in pine  
417 forests (Glassman et al., 2016; Pulido-Chavez et al., 2021; Reazin et al., 2016). This large-scale  
418 reduction in the microbial richness can have far reaching impacts on the surrounding ecosystem  
419 from radically altered nutrient cycling (Crowther et al., 2019) to the inability to reestablish  
420 critical plant species (Van der Heijden et al., 2008).

421       The mega-fire led to large compositional shifts in both bacterial (27%) and fungal (24%)  
422 communities (Figure 3). Studies often report significant changes in fungal compositional  
423 turnover post-fire but variable change in bacterial composition (Pérez-Valera et al., 2018;  
424 Pressler et al., 2019). However, sampling immediately post-fire does reveal significant  
425 reductions in bacterial richness and evenness (Brown et al., 2019; Ferrenberg et al., 2013) and  
426 one study showed with increasing fire severity the reduction in richness and evenness becomes  
427 more drastic (Brown et al., 2019). Depending on the biome, changes in microbial composition  
428 can be as short lived as 21 days after simulated soil heating (Bárcenas-Moreno & Bååth, 2009) or  
429 as long as 19 years post-fire in a Spanish Mediterranean ecosystem (Pérez-Valera et al., 2018). A  
430 study in a Chinese pine forest speculated that bacterial composition would recover within one  
431 growing season based on data from 6 months post-fire (Li et al., 2019). This disparity in  
432 resilience is likely due to differences in fire severity and timing of post-fire sampling. Fires that  
433 are not as severe often produce smaller shifts in bacterial and fungal composition (Buscardo et  
434 al., 2010). The effect of fire on microbial richness and composition is also likely more transient

## Mega-Fire Effect on Pyrophilous Microbes

435 in some biomes and longer lasting in others. As such, studies that sample 1-2 years post-fire may  
436 miss changes in bacterial and fungal communities depending on the biome. In the case of our  
437 data, these observed changes stemmed from a severe mega-fire where the changes to the  
438 landscape can be quite drastic and took place in a well-established forest and therefore recovery  
439 could take much longer.

440 Changes in dominance can be important indicators of how post-fire microbial  
441 communities assemble, as has been documented in plant communities (Moser & Wohlgemuth,  
442 2006). Fires often lead to shifts in plant community evenness to increased dominance by specific  
443 fire-adapted species such as long leaf pine (Glitzenstein et al., 1995), *Ceanothus* shrubs (Lawson  
444 et al., 2010), or Manzanita in chaparral systems (Vogl & Schorr, 1972). These effects can be  
445 more pronounced when fire severity increases (Kuenzi et al., 2008). Fire similarly alters  
446 microbial community assembly processes (Ferrenberg et al., 2013). Here, we find patterns of fire  
447 induced-dominance in microbial communities, with a single fungal taxon (*Basidioascus*  
448 *undulates*) dominating 28% and a single bacterial taxon (*Sporosarcina spp.*) dominating 7% of  
449 the sequences post-fire. While changes in dominance have been documented in microbial  
450 communities post-fire (Pérez-Valera et al., 2018; Whitman et al., 2019), they are at lower levels  
451 (2-4% for most abundant taxon) likely because they sampled later after the fire and after the first  
452 rains post-fire thus obscuring initial compositional shifts. An experimental fire in laboratory  
453 “pyrocasm” (a small-scale highly controlled experimental fire to test the effects of fire on soil  
454 samples) similarly found huge increases in dominance with the most abundant taxon *Pyronema*  
455 *domesticum* occupying 57% of the sequences within 2 weeks of the fire (Bruns et al., 2020). We  
456 interpret this level of dominance to indicate the opening of niche space due to massive microbial

## Mega-Fire Effect on Pyrophilous Microbes

457 death of the pre-fire dominants that allows the few microbial taxa that are thermotolerant or  
458 capable of capitalizing on post-fire resources or eating microbial necromass to take over.

459         After fire, we found a complete turnover in the abundant bacterial taxa (>1% sequence  
460 abundant) from Proteobacteria and Acidobacteria domination to Firmicutes and a few  
461 Actinobacteria (Figure 4). These changes are likely driven by thermotolerance of endospore  
462 forming Firmicutes, which have also been found to increase in abundance following laboratory  
463 heat treatments of soil samples (Filippidou et al., 2016; Jurburg et al., 2017) and soon after  
464 Mediterranean fires (Pérez-Valera et al., 2020). Post-fire environments are often characterized by  
465 increases in pH (Neary et al., 1999), which may favor both thermotolerant and alkaline tolerant  
466 Actinobacteria (Shivlata & Tulasi, 2015). Of the specific genera dominating our communities  
467 post-fire, only *Thermoflavimicrobium* (Yoon et al., 2005) and *Sporosarcina* (Jurburg et al., 2017)  
468 have previously been shown to increase after laboratory heating. Other studies have shown an  
469 increase in Actinobacteria and Firmicutes post-fire, though only the *Bacillus spp.* in our study is  
470 a potentially shared taxon with those other studies (Ferrenberg et al., 2013; Li et al., 2019;  
471 Whitman et al., 2019). In contrast, most other groups of bacteria negatively responded to fire, or  
472 only responded positively sporadically within a clade (Figure 5). Lineages can have differing  
473 responses within a clade when lineages challenged with the same evolutionary pressures do not  
474 respond the same way (Isobe et al., 2019). Furthermore, the degree to which a trait is conserved  
475 within lineages may reflect the genetic complexity of the response or trait, with more complex  
476 responses being less conserved due to needing many pathways to be conserved across all taxa of  
477 a lineage (Isobe et al., 2019). It may be then that the genetic drivers of Firmicutes' response to  
478 fire are either less genetically complex or more genetically integral to that phylum while  
479 Actinobacteria's response may be genetically varied or require the conservation of a greater

## Mega-Fire Effect on Pyrophilous Microbes

480 number of genetic pathways in order to successfully adapt to fire. Finally, as this study is among  
481 the first to comprehensively characterize the soil microbiome of the charismatic redwood-tanoak  
482 forests, we note a few similarities in our pre-fire soils with a recent bacterial study of coastal  
483 redwood roots which also showed the most abundant taxa as *Bradyrhizobium* and *Rhodoplanes*  
484 (Willing et al., 2020). Additionally, a study of the microbial composition of the coastal  
485 redwood's sister genus, the giant sequoia (*Sequoiadendron giganteum*), also showed domination  
486 by *Bradyrhizobium* and Sinobacteraceae sp. of the Proteobacteria (Carey et al., 2019). The  
487 similarities with the giant sequoia soil communities also extend to fungi, with *Hygrocybe*  
488 dominating both our redwood forests pre-fire and in the giant sequoia forest.

489         After the fire, the fungal communities were dominated (28%) by the yeast *Basidioascus*  
490 *undulates*, which was rare (0.05%) pre-fire. *Basidioascus* and *Geminibasidium* are newly  
491 described heat-resistant and xerotolerant Basidiomycete yeasts isolated from laboratory heat-  
492 treatments to soil (Nguyen et al., 2013). *Basidioascus* was originally described as an Ascomycete  
493 because their spores were spuriously described as single-spored asci. Perhaps the visual  
494 similarity to Ascomycetes is representative of convergent evolution with other ascomycetes,  
495 which are more often associated with fire (Cairney & Bastias, 2007). Only one other wildfire  
496 study has found *Basidioascus* to increase post-fire (Pulido-Chavez et al., 2021) though not with  
497 the level of dominance in our study. A couple recent studies have found an increase in  
498 dominance of the sister genus *Geminibasidium*, including a study of a *Pinus ponderosa* forest in  
499 the American Pacific Northwest (Pulido-Chavez et al., 2021) and a study of *Larix* and *Betula*  
500 dominated forests in northeastern China (Yang et al., 2020). *Geminibasidium* was also present at  
501 0.05% sequence abundance, the same amount as our pre-fire soil, in an unburned giant sequoia  
502 forest (Carey et al., 2019). While Geminibasidiomycetes are positively selected for by fire

## Mega-Fire Effect on Pyrophilous Microbes

503 (Figure 6) likely due to their thermotolerance and xerotolerance (Nguyen et al., 2013), they have  
504 been missed by existing descriptions of pyrophilous fungi that are mainly based on fruiting body  
505 surveys (McMullan-Fisher et al., 2011).

506         Despite the most dominant post-fire fungus being a Basidiomycete, overall the  
507 community shifted from Basidiomycete to Ascomycete dominated post-fire, with particular  
508 increases in the Pezizomycete and Eurotiomycete lineages (Figure 6). The shift from  
509 Basidiomycete to Ascomycete dominance is well established in the post-fire fungal literature  
510 (Cairney & Bastias, 2007) with similar findings across diverse biomes ranging from  
511 Mediterranean shrublands of Spain (Pérez-Valera et al., 2018) to pine savannas of the American  
512 southeast (Semenova-Nelsen et al., 2019). Four of the five fire indicator taxa (Table S6) belong  
513 to the Pyronemataceae, which have long been known to fruit extensively after fires (Seaver,  
514 1909). In addition to evidence from fruiting body surveys, the Pyronemataceae genus *Pyronema*  
515 can also dominate belowground mycelium by as much as 60% after experimental laboratory fires  
516 (Bruns et al., 2020) and increased 100 fold in frequency after prescribed fires in a *P. ponderosa*  
517 forest (Reazin et al., 2016). *Geopyxis alpina* was also an indicator of fire, and at least two species  
518 of *Geopyxis* species are known to fruit exclusively on burned soil (Wang et al., 2016). The  
519 Pyronemataceae produce sporocarps that are small orange cup fungi that appear on pyrolyzed  
520 material after burning (El-Abyad & Webster, 1968). It is possible that their color or morphology  
521 makes them better adapted to post-fire scenarios, for example many of them are orange and  
522 contain carotenoids (Carlile & Friend, 1956) which may add UV protection (Luque et al., 2012).  
523 However, it is also likely that they survive fires due to their ability to form resistant propagules  
524 called sclerotia (Smith et al., 2015) which may be thermotolerant (Richter & Barnard, 2002).  
525 While Eurotiomycetes are widespread fungi, it is possible that their ability to grow fast and

## Mega-Fire Effect on Pyrophilous Microbes

526 produce ubiquitous spores help them colonize open niche space after fires, as they were similarly  
527 common after wildfires in a Canadian boreal forest (Whitman et al., 2019) and in northeastern  
528 China (Yang et al., 2020). This would be analogous to the fast-colonization trait of fire adapted  
529 plants sprouting in the newly opened niche of burn zones (Keeley et al., 2011). Moreover,  
530 several species of *Aspergillus* and *Penicillium* have evidence of heat activated spores (Warcup &  
531 Baker, 1963). Much like our reasoning for why some bacterial clades responded better to fire, the  
532 Pezizomycetes may all share a similar, conserved response to fire that is less genetically  
533 complex, more basal, or more deeply conserved than the response exhibited by the Eurotiales,  
534 which may explain why all lineages within the Pezizomycetes responded positively to fire while  
535 not all lineages of the Eurotiomycetes did (Figure 6). When discussing the phylogenetic signal  
536 obtained in our analyses, we are aware of the limitations of ITS based phylogenies compared  
537 with phylogenies constructed involving 18S or 28S data and therefore the statistical significance  
538 portrayed in our consentRAIT analysis (Figure 6) may not be as reliable as the analysis done  
539 with the 16S phylogeny (Figure 5). However, we feel confident in continuing to draw  
540 meaningful conclusions from our phylogenetic analysis as the observed signal (either positively  
541 or negatively responding) is tightly clustered within clades, and the positively responding taxa  
542 from which we form additional hypotheses (eg. Pyronemataceae, Eurotiales,  
543 Geminibasidiomycetes) have strong support in the literature behaving as observed. Future  
544 phylogenetic studies on pyrophilous fungi would benefit from sequencing which includes 18S or  
545 28S information.

546 Critically analyzing similarities between certain groups of pyrophilous microbes has  
547 brought us to the hypothesis that there may be certain traits that characterize a microbe's ability  
548 to thrive post-fire, which should be able to be placed into a conceptual framework (H3). These



## Mega-Fire Effect on Pyrophilous Microbes

549 traits may be analogous to the traits exhibited by fire-tolerant plants (e.g. thick bark, production  
550 of serotinous cones, etc.), which themselves fall into fairly well defined suites (vegetative re-  
551 sprouters, structural resistance to fire, and rapid colonizers post-fire) (Keeley et al., 2011). We  
552 thus propose that microbes survive fire by analogous traits to plants and build from Grime's  
553 Competitive-Stress-Ruderal (C-S-R) model (Grime, 1977), its adaptation to mycorrhizal fungi  
554 (Chagnon et al., 2013) and to microbial decomposers (Malik et al., 2020), and a recent study  
555 from a Canadian boreal forest fire (Whitman et al., 2019). Pyrophilous microbes appear to  
556 survive fire via trade-offs among microbial ability acquire post-fire resources (analogous to  
557 Grime's C), tolerate heat or desiccation (analogous to Grime's S), or early colonize or grow fast  
558 (analogous to Grime's R) (Figure 7). Furthermore, as trade-offs among traits can be used to  
559 predict decomposition rates among wood decomposer fungi (Lustenhouwer et al., 2020), we  
560 predict that trade-offs among fire response traits might enable prediction of post-fire  
561 biogeochemical cycling. For example, the DEMENT model uses traits to improve forecasting of  
562 soil carbon by considering trade-offs between a microorganism's ability to decompose litter  
563 versus tolerate drought (Allison & Goulden, 2017). Similarly, trade-offs between a microbe's  
564 ability to survive fire by thermotolerance versus decomposing pyrogenic organic matter might  
565 predict changes in carbon cycling post-fire. This could be further highlighted by a trade-off of  
566 post-fire nutrient acquisition strategy microbes growing slowly as they work to breakdown  
567 recalcitrant carbon forms present in PyOM, slowly releasing this carbon for cycling, as opposed  
568 to fast-growing microbes taking advantage of easily accessible labile carbon. We hypothesize  
569 that several known pyrophilous taxa observed in this study and in others would fall into these  
570 suites of traits. For post-fire resource acquisition, basidiomycetes such as *Pholiota highlandensis*  
571 or *Lyophyllum atratum* might be more likely to degrade pyrolyzed organic matter due to their

## Mega-Fire Effect on Pyrophilous Microbes

572 enzymatic capabilities, as supported by recent sequencing of their genomes (Steindorff et al.,  
573 2020), and *Fusarium* may be capable of denitrifying highly abundant nitrogen (Maeda et al.,  
574 2015). For thermotolerance, *Neurospora crassa* has heat-activated spores and *Rhizopogon*  
575 *olivaceotinctus* has spores that increase after heat treatment (Bruns et al., 2019; Emerson, 1948)  
576 and *Pyronema* may produce thermotolerant sclerotia (Moore, 1962). *Aspergillus* and *Penicillium*  
577 are likely fast-colonizers due to highly abundant spore production. However, it is also possible  
578 that certain species fall along a continuum of traits and that trade-offs may not be so strict. For  
579 example, but *Aspergillus* and *Penicillium* species are also likely thermotolerant (Warcup &  
580 Baker, 1963), and some *Penicillium* species have been found to degrade polycyclic aromatic  
581 hydrocarbons (PAHs), such as those that might be produced through combustion (Leitão, 2009).  
582 Similarly, the yeast *Basidioascus* tolerates stress with its xero- and thermo-tolerance but as a  
583 yeast may also be a fast-colonizer since it is unicellular. As our hypothesis regarding post-fire  
584 microbial trait suites expands, it may evolve into a more multi-faceted niche space as is currently  
585 used in plant trait models (Díaz et al., 2016).

586 We propose that this trait based conceptual model works for pyrophilous bacteria as well  
587 as fungi (Figure 7). For example, for post-fire resource acquisition, there are a few studies  
588 claiming *Arthrobacter* may be capable of degrading pyrogenic organic matter (Fernández-  
589 González et al., 2017; Woolet & Whitman, 2020) and so may *Nocardiodes* (Woolet & Whitman,  
590 2020). It is also possible that ammonifying bacteria may be able to capitalize on post-fire high  
591 nitrogen content (Johnson & Curtis, 2001), and indeed one study did find that ammonifying  
592 bacteria increased post-fire while ammonia-oxidizing bacteria did not (Aceá & Carballas, 1996).  
593 For thermotolerance, members of the Firmicutes are good candidates since they are almost all  
594 spore-forming bacteria (Barberán et al., 2017; Filippidou et al., 2016). For fast growth or

## Mega-Fire Effect on Pyrophilous Microbes

595 colonization, the Proteobacteria genus *Massilia* has been hypothesized as a fast responder due to  
596 a predicted high 16S copy number (Nemergut et al., 2016; Whitman et al., 2019). We believe  
597 that categorizing pyrophilous microbes into traits will improve prediction of biogeochemical  
598 cycling post-fire. Just as redwoods survive fire with thick bark and tanoaks are vegetative re-  
599 sprouters, it is likely that microbes have similar strategies and this diversity of fire-responsive  
600 traits both above and belowground will enhance forest resilience to the unprecedented rise of  
601 mega-fires. However, whether they will recover from synergistic effects of introduced pathogens  
602 and global change (Simler et al., 2018) remains unclear.

603

### 604 **Conclusions**

605 In conclusion, we present the first study examining the immediate effects of a megafire  
606 on both bacterial and fungal communities with a rare data set of pre- and post-fire samples and  
607 also the first study to comprehensively characterize the soil microbial communities of a redwood  
608 tanoak forest. We know of only two other instances where pre- and post-fire samples from the  
609 same locations exist (Baar et al., 1999; Glassman et al., 2016), but both were in pine forests,  
610 focused only on EMF communities, and both lacked an unburned control. We identified a  
611 massive increase in the Basidiomycete yeast *Basidioascus* and the bacterial Firmicutes post-fire,  
612 and we showed that pyrophilous bacteria and fungi and their traits are phylogenetically  
613 conserved at the class level. By comparing our work to other recent molecular characterizations  
614 of post-fire microbes in Pinaceae forests (Bruns et al., 2020; Glassman et al., 2016; Whitman et  
615 al., 2019), we can now begin to generalize traits of post-fire microbes to other forest types and  
616 compare them to analogous traits in plants (Figure 7). For example, we hypothesize certain  
617 bacteria (Firmicutes) and fungi (Pyronemataceae) appear to be able to survive fire with

## Mega-Fire Effect on Pyrophilous Microbes

618 thermotolerant structures, and other fungi (*Penicillium*) or bacteria (*Massilia*) are fast-  
619 responders, and trade-offs might exist among these traits. Future studies of post-fire systems in a  
620 broad variety of ecosystems, and experimental determinations of microbial traits, will allow us to  
621 further characterize and generalize traits of post-fire microbes so that we can refine our  
622 conceptual model and reach the level of knowledge of post-fire traits of plants.

623

624 **Acknowledgements:** We would like to acknowledge Monterey Peninsula Regional Park District  
625 (Plots 601, 603) and the University of California's Landels-Hill Big Creek Reserve (Plot 058).  
626 We thank Michael Ernandes and Tom Bruns for their assistance in collecting pre-fire soils, Judy  
627 Chung for assistance with molecular work, and James Randolph for assistance with conceptual  
628 figure artwork. DJE is supported by the National Science Foundation Graduate Research  
629 Fellowship and the Oregon Mycological Society Scholarship.

630

### 631 **Competing Interests**

632 The authors declare no conflicts of interest or competing financial interests in relation to the  
633 work described.

634

### 635 **References**

636 Acea, M. J., & Carballas, T. (1996). Changes in physiological groups of microorganisms in soil  
637 following wildfire. *FEMS Microbiology Ecology*, 20(1), 33–39.  
638 <https://doi.org/10.1111/j.1574-6941.1996.tb00302.x>

## Mega-Fire Effect on Pyrophilous Microbes

- 639 Afek, U., Lippet, L. A., Adams, D., Menge, J. A., & Pond, E. (1994). Vesicular–Arbuscular  
640 Mycorrhizae Colonization of Redwood and Incense Cedar Seedlings following Storage.  
641 *HortScience*, 29(11), 1362–1365. <https://doi.org/10.21273/HORTSCI.29.11.1362>
- 642 Allison, S. D., & Goulden, M. L. (2017). Consequences of drought tolerance traits for microbial  
643 decomposition in the DEMENT model. *Soil Biology and Biochemistry*, 107, 104–113.  
644 <https://doi.org/10.1016/j.soilbio.2017.01.001>
- 645 Anderson, M. J., Gorley, R. N., & Clarke, R. K. (2008). *Permanova+ for Primer: Guide to*  
646 *software and statisticl methods*.
- 647 Archibald, S., Lehmann, C. E. R., Gómez-Dans, J. L., & Bradstock, R. A. (2013). Defining  
648 pyromes and global syndromes of fire regimes. *Proceedings of the National Academy of*  
649 *Sciences*, 110(16), 6442–6447. <https://doi.org/10.1073/pnas.1211466110>
- 650 Baar, J., Horton, T. R., Kretzer, A. M., & Bruns, T. D. (1999). Mycorrhizal colonization of *Pinus*  
651 *muricata* from resistant propagules after a stand-replacing wildfire. *The New Phytologist*,  
652 143(2), 409–418. <https://doi.org/10.1046/j.1469-8137.1999.00452.x>
- 653 Barberán, A., Velazquez, H. C., Jones, S., & Fierer, N. (2017). Hiding in Plain Sight: Mining  
654 Bacterial Species Records for Phenotypic Trait Information. *MSphere*, 2(4).  
655 <https://doi.org/10.1128/mSphere.00237-17>
- 656 Bárcenas-Moreno, G., & Bååth, E. (2009). Bacterial and fungal growth in soil heated at different  
657 temperatures to simulate a range of fire intensities. *Soil Biology and Biochemistry*,  
658 41(12), 2517–2526. <https://doi.org/10.1016/j.soilbio.2009.09.010>
- 659 Bergemann, S. E., & Garbelotto, M. (2006). High diversity of fungi recovered from the roots of  
660 mature tanoak (*Lithocarpus densiflorus*) in northern California. *Canadian Journal of*  
661 *Botany*, 84(9), 1380–1394. <https://doi.org/10.1139/b06-097>

## Mega-Fire Effect on Pyrophilous Microbes

- 662 Brown, S., Callaham, M. A., Oliver, A. K., & Jumpponen, A. (2013). Deep Ion Torrent  
663 sequencing identifies soil fungal community shifts after frequent prescribed fires in a  
664 southeastern US forest ecosystem. *FEMS Microbiology Ecology*, *86*(3), 557–566.  
665 <https://doi.org/10.1111/1574-6941.12181>
- 666 Brown, S., Veach, A., Horton, J., Ford, E., Jumpponen, A., & Baird, R. (2019). Context  
667 dependent fungal and bacterial soil community shifts in response to recent wildfires in  
668 the Southern Appalachian Mountains. *Forest Ecology and Management*.  
669 <https://doi.org/10.1016/j.foreco.2019.117520>
- 670 Brundrett, M. C., & Tedersoo, L. (2018). Evolutionary history of mycorrhizal symbioses and  
671 global host plant diversity. *New Phytologist*, 1108–1115.  
672 [https://doi.org/10.1111/nph.14976@10.1111/\(ISSN\)1469-8137.cross-](https://doi.org/10.1111/nph.14976@10.1111/(ISSN)1469-8137.cross-scaleintergrationofmycorrhizalfunction)  
673 [scaleintergrationofmycorrhizalfunction](https://doi.org/10.1111/nph.14976@10.1111/(ISSN)1469-8137.cross-scaleintergrationofmycorrhizalfunction)
- 674 Bruns, T. D., Chung, J. A., Carver, A. A., & Glassman, S. I. (2020). A simple pyrocosm for  
675 studying soil microbial response to fire reveals a rapid, massive response by *Pyronema*  
676 species. *PLOS ONE*, *15*(3), e0222691. <https://doi.org/10.1371/journal.pone.0222691>
- 677 Bruns, T. D., Hale, M. L., & Nguyen, N. H. (2019). *Rhizopogon olivaceotinctus* increases its  
678 inoculum potential in heated soil independent of competitive release from other  
679 ectomycorrhizal fungi. *Mycologia*, *111*(6), 936–941.  
680 <https://doi.org/10.1080/00275514.2019.1657354>
- 681 Buscardo, E., Rodríguez-Echeverría, S., Martín, M. P., De Angelis, P., Pereira, J. S., & Freitas,  
682 H. (2010). Impact of wildfire return interval on the ectomycorrhizal resistant propagules  
683 communities of a Mediterranean open forest. *Fungal Biology*, *114*(8), 628–636.  
684 <https://doi.org/10.1016/j.funbio.2010.05.004>

## Mega-Fire Effect on Pyrophilous Microbes

- 685 Cáceres, M. D., & Jansen, F. (2019). *indicspecies: Relationship Between Species and Groups of*  
686 *Sites* (1.7.8) [Computer software]. <https://CRAN.R-project.org/package=indicspecies>
- 687 Cairney, J. W. G., & Bastias, B. A. (2007). Influences of fire on forest soil fungal communities.  
688 *Canadian Journal of Forest Research*, 37(2), 207–215. <https://doi.org/10.1139/x06-190>
- 689 Caporaso, J. G., Kuczynski, J., Stombaugh, J., Bittinger, K., Bushman, F. D., Costello, E. K.,  
690 Fierer, N., Peña, A. G., Goodrich, J. K., Gordon, J. I., Huttley, G. A., Kelley, S. T.,  
691 Knights, D., Koenig, J. E., Ley, R. E., Lozupone, C. A., McDonald, D., Muegge, B. D.,  
692 Pirrung, M., ... Knight, R. (2010). QIIME allows analysis of high-throughput community  
693 sequencing data. *Nature Methods*, 7(5), 335–336. <https://doi.org/10.1038/nmeth.f.303>
- 694 Caporaso, J. G., Lauber, C. L., Walters, W. A., Berg-Lyons, D., Lozupone, C. A., Turnbaugh, P.  
695 J., Fierer, N., & Knight, R. (2011). Global patterns of 16S rRNA diversity at a depth of  
696 millions of sequences per sample. *Proceedings of the National Academy of Sciences*,  
697 108(Supplement 1), 4516–4522. <https://doi.org/10.1073/pnas.1000080107>
- 698 Carey, C. J., Glassman, S. I., Bruns, T. D., Aronson, E. L., & Hart, S. C. (2019). Soil microbial  
699 communities associated with giant sequoia: How does the world’s largest tree affect some  
700 of the world’s smallest organisms? *Ecology and Evolution*, 10(13).  
701 <https://doi.org/10.1002/ece3.6392>
- 702 Carlile, M. J., & Friend, J. (1956). Carotenoids and Reproduction in *Pyronema confluens*.  
703 *Nature*, 178(4529), 369–370. <https://doi.org/10.1038/178369a0>
- 704 Chagnon, P.-L., Bradley, R. L., Maherali, H., & Klironomos, J. N. (2013). A trait-based  
705 framework to understand life history of mycorrhizal fungi. *Trends in Plant Science*,  
706 18(9), 484–491. <https://doi.org/10.1016/j.tplants.2013.05.001>

## Mega-Fire Effect on Pyrophilous Microbes

- 707 Collier, F. A., & Bidartondo, M. I. (2009). Waiting for fungi: The ectomycorrhizal invasion of  
708 lowland heathlands. *Journal of Ecology*, 97(5), 950–963. <https://doi.org/10.1111/j.1365->  
709 2745.2009.01544.x
- 710 Conquest, L. L. (2000). Analysis and Interpretation of Ecological Field Data Using BACI  
711 Designs: Discussion. *Journal of Agricultural, Biological, and Environmental Statistics*,  
712 5(3), 293–296. JSTOR. <https://doi.org/10.2307/1400455>
- 713 Crowther, T. W., Hoogen, J. van den, Wan, J., Mayes, M. A., Keiser, A. D., Mo, L., Averill, C.,  
714 & Maynard, D. S. (2019). The global soil community and its influence on  
715 biogeochemistry. *Science*, 365(6455). <https://doi.org/10.1126/science.aav0550>
- 716 Day, N. J., Dunfield, K. E., Johnstone, J. F., Mack, M. C., Turetsky, M. R., Walker, X. J., White,  
717 A. L., & Baltzer, J. L. (2019). Wildfire severity reduces richness and alters composition  
718 of soil fungal communities in boreal forests of western Canada. *Global Change Biology*.  
719 <https://doi.org/10.1111/gcb.14641>
- 720 DeSantis, T. Z., Hugenholtz, P., Larsen, N., Rojas, M., Brodie, E. L., Keller, K., Huber, T.,  
721 Dalevi, D., Hu, P., & Andersen, G. L. (2006). Greengenes, a Chimera-Checked 16S  
722 rRNA Gene Database and Workbench Compatible with ARB. *Applied and*  
723 *Environmental Microbiology*, 72(7), 5069–5072. <https://doi.org/10.1128/AEM.03006-05>
- 724 Díaz, S., Kattge, J., Cornelissen, J. H. C., Wright, I. J., Lavorel, S., Dray, S., Reu, B., Kleyer, M.,  
725 Wirth, C., Colin Prentice, I., Garnier, E., Bönsch, G., Westoby, M., Poorter, H., Reich, P.  
726 B., Moles, A. T., Dickie, J., Gillison, A. N., Zanne, A. E., ... Gorné, L. D. (2016). The  
727 global spectrum of plant form and function. *Nature*, 529(7585), 167–171.  
728 <https://doi.org/10.1038/nature16489>



## Mega-Fire Effect on Pyrophilous Microbes

- 729 Dooley, S. R., & Treseder, K. K. (2012). The effect of fire on microbial biomass: A meta-  
730 analysis of field studies. *Biogeochemistry*, *109*(1), 49–61. [https://doi.org/10.1007/s10533-](https://doi.org/10.1007/s10533-011-9633-8)  
731 [011-9633-8](https://doi.org/10.1007/s10533-011-9633-8)
- 732 Dove, N. C., & Hart, S. C. (2017). Fire Reduces Fungal Species Richness and In Situ  
733 Mycorrhizal Colonization: A Meta-Analysis. *Fire Ecology*, *13*(2), 37–65.  
734 <https://doi.org/10.4996/fireecology.130237746>
- 735 Edgar, R. C. (2013). UPARSE: Highly accurate OTU sequences from microbial amplicon reads.  
736 *Nature Methods*, *10*(10), 996–998. <https://doi.org/10.1038/nmeth.2604>
- 737 El-Abyad, M. S. H., & Webster, J. (1968). Studies on pyrophilous discomycetes: I. Comparative  
738 physiological studies. *Transactions of the British Mycological Society*, *51*(3), 353–367.  
739 [https://doi.org/10.1016/S0007-1536\(68\)80002-6](https://doi.org/10.1016/S0007-1536(68)80002-6)
- 740 Emerson, M. R. (1948). Chemical Activation of Ascospore Germination in *Neurospora crassa*.  
741 *Journal of Bacteriology*, *55*(3), 327–330.
- 742 Fernández-González, A. J., Martínez-Hidalgo, P., Cobo-Díaz, J. F., Villadas, P. J., Martínez-  
743 Molina, E., Toro, N., Tringe, S. G., & Fernández-López, M. (2017). The rhizosphere  
744 microbiome of burned holm-oak: Potential role of the genus *Arthrobacter* in the recovery  
745 of burned soils. *Scientific Reports*, *7*(1), 6008. [https://doi.org/10.1038/s41598-017-](https://doi.org/10.1038/s41598-017-06112-3)  
746 [06112-3](https://doi.org/10.1038/s41598-017-06112-3)
- 747 Ferrenberg, S., O’Neill, S. P., Knelman, J. E., Todd, B., Duggan, S., Bradley, D., Robinson, T.,  
748 Schmidt, S. K., Townsend, A. R., Williams, M. W., Cleveland, C. C., Melbourne, B. A.,  
749 Jiang, L., & Nemergut, D. R. (2013). Changes in assembly processes in soil bacterial  
750 communities following a wildfire disturbance. *The ISME Journal*, *7*(6), 1102–1111.  
751 <https://doi.org/10.1038/ismej.2013.11>

## Mega-Fire Effect on Pyrophilous Microbes

- 752 Filippidou, S., Wunderlin, T., Junier, T., Jeanneret, N., Dorador, C., Molina, V., Johnson, D. R.,  
753 & Junier, P. (2016). A Combination of Extreme Environmental Conditions Favor the  
754 Prevalence of Endospore-Forming Firmicutes. *Frontiers in Microbiology*, 7.  
755 <https://doi.org/10.3389/fmicb.2016.01707>
- 756 Fouquier, J., Rideout, J. R., Bolyen, E., Chase, J., Shiffer, A., McDonald, D., Knight, R.,  
757 Caporaso, J. G., & Kelley, S. T. (2016). ghost-tree: Creating hybrid-gene phylogenetic  
758 trees for diversity analyses. *Microbiome*, 4(1), 11. [https://doi.org/10.1186/s40168-016-](https://doi.org/10.1186/s40168-016-0153-6)  
759 0153-6
- 760 Fujimura, K. E., Smith, J. E., Horton, T. R., Weber, N. S., & Spatafora, J. W. (2005). Pezizalean  
761 mycorrhizas and sporocarps in ponderosa pine (*Pinus ponderosa*) after prescribed fires in  
762 eastern Oregon, USA. *Mycorrhiza*, 15(2), 79–86. [https://doi.org/10.1007/s00572-004-](https://doi.org/10.1007/s00572-004-0303-8)  
763 0303-8
- 764 Glassman, S. I., Levine, C. R., DiRocco, A. M., Battles, J. J., & Bruns, T. D. (2016).  
765 Ectomycorrhizal fungal spore bank recovery after a severe forest fire: Some like it hot.  
766 *The ISME Journal*, 10(5), 1228–1239. <https://doi.org/10.1038/ismej.2015.182>
- 767 Glassman, S. I., Weihe, C., Li, J., Albright, M. B. N., Looby, C. I., Martiny, A. C., Treseder, K.  
768 K., Allison, S. D., & Martiny, J. B. H. (2018). Decomposition responses to climate  
769 depend on microbial community composition. *Proceedings of the National Academy of*  
770 *Sciences*, 115(47), 11994–11999. <https://doi.org/10.1073/pnas.1811269115>
- 771 Glitzenstein, J. S., Platt, W. J., & Streng, D. R. (1995). Effects of Fire Regime and Habitat on  
772 Tree Dynamics in North Florida Longleaf Pine Savannas. *Ecological Monographs*, 65(4),  
773 441–476. <https://doi.org/10.2307/2963498>

## Mega-Fire Effect on Pyrophilous Microbes

- 774 Grime, J. P. (1977). Evidence for the Existence of Three Primary Strategies in Plants and Its  
775 Relevance to Ecological and Evolutionary Theory. *The American Naturalist*, *111*(982),  
776 1169–1194. <https://doi.org/10.1086/283244>
- 777 He, T., & Lamont, B. B. (2018). Baptism by fire: The pivotal role of ancient conflagrations in  
778 evolution of the Earth’s flora. *National Science Review*, *5*(2), 237–254.  
779 <https://doi.org/10.1093/nsr/nwx041>
- 780 Isobe, K., Allison, S. D., Khalili, B., Martiny, A. C., & Martiny, J. B. H. (2019). Phylogenetic  
781 conservation of bacterial responses to soil nitrogen addition across continents. *Nature*  
782 *Communications*, *10*(1), 1–8. <https://doi.org/10.1038/s41467-019-10390-y>
- 783 Isobe, K., Bouskill, N. J., Brodie, E. L., Sudderth, E. A., & Martiny, J. B. H. (2020).  
784 Phylogenetic conservation of soil bacterial responses to simulated global changes.  
785 *Philosophical Transactions of the Royal Society B: Biological Sciences*, *375*(1798),  
786 20190242. <https://doi.org/10.1098/rstb.2019.0242>
- 787 Johnson, D. W., & Curtis, P. S. (2001). Effects of forest management on soil C and N storage:  
788 Meta analysis. *Forest Ecology and Management*, *140*(2), 227–238.  
789 [https://doi.org/10.1016/S0378-1127\(00\)00282-6](https://doi.org/10.1016/S0378-1127(00)00282-6)
- 790 Jurburg, S. D., Nunes, I., Brejnrod, A., Jacquiod, S., Priemé, A., Sørensen, S. J., Van Elsas, J. D.,  
791 & Salles, J. F. (2017). Legacy Effects on the Recovery of Soil Bacterial Communities  
792 from Extreme Temperature Perturbation. *Frontiers in Microbiology*, *8*.  
793 <https://doi.org/10.3389/fmicb.2017.01832>
- 794 Keeley, J. E., Pausas, J. G., Rundel, P. W., Bond, W. J., & Bradstock, R. A. (2011). Fire as an  
795 evolutionary pressure shaping plant traits. *Trends in Plant Science*, *16*(8), 406–411.  
796 <https://doi.org/10.1016/j.tplants.2011.04.002>

## Mega-Fire Effect on Pyrophilous Microbes

- 797 Kindt, R. (2019). *BiodiversityR: Package for Community Ecology and Suitability Analysis* (2.11-  
798 3) [Computer software]. <https://CRAN.R-project.org/package=BiodiversityR>
- 799 Kõljalg, U., Larsson, K.-H., Abarenkov, K., Nilsson, R. H., Alexander, I. J., Eberhardt, U.,  
800 Erland, S., Høiland, K., Kjølner, R., Larsson, E., Pennanen, T., Sen, R., Taylor, A. F. S.,  
801 Tedersoo, L., & Vrålstad, T. (2005). UNITE: A database providing web-based methods  
802 for the molecular identification of ectomycorrhizal fungi. *New Phytologist*, *166*(3), 1063–  
803 1068. <https://doi.org/10.1111/j.1469-8137.2005.01376.x>
- 804 Kuenzi, A. M., Fulé, P. Z., & Sieg, C. H. (2008). Effects of fire severity and pre-fire stand  
805 treatment on plant community recovery after a large wildfire. *Forest Ecology and*  
806 *Management*, *255*(3), 855–865. <https://doi.org/10.1016/j.foreco.2007.10.001>
- 807 Lawson, D. M., Regan, H. M., Zedler, P. H., & Franklin, J. (2010). Cumulative effects of land  
808 use, altered fire regime and climate change on persistence of *Ceanothus verrucosus*, a  
809 rare, fire-dependent plant species. *Global Change Biology*, *16*(9), 2518–2529.  
810 <https://doi.org/10.1111/j.1365-2486.2009.02143.x>
- 811 Lehmann, A., Zheng, W., & Rillig, M. C. (2017). Soil biota contributions to soil aggregation.  
812 *Nature Ecology & Evolution*, *1*(12), 1828–1835. <https://doi.org/10.1038/s41559-017-0344-y>
- 813
- 814 Leitão, A. L. (2009). Potential of *Penicillium* Species in the Bioremediation Field. *International*  
815 *Journal of Environmental Research and Public Health*, *6*(4), 1393–1417.  
816 <https://doi.org/10.3390/ijerph6041393>
- 817 Letunic, I., & Bork, P. (2007). Interactive Tree Of Life (iTOL): An online tool for phylogenetic  
818 tree display and annotation. *Bioinformatics*, *23*(1), 127–128.  
819 <https://doi.org/10.1093/bioinformatics/bt1529>

## Mega-Fire Effect on Pyrophilous Microbes

- 820 Li, W., Niu, S., Liu, X., & Wang, J. (2019). Short-term response of the soil bacterial community  
821 to differing wildfire severity in *Pinus tabulaeformis* stands. *Scientific Reports*, 9(1), 1148.  
822 <https://doi.org/10.1038/s41598-019-38541-7>
- 823 Love, M., Ahlmann-Eltze, C., Anders, S., & Huber, W. (2019). *DESeq2: Differential gene*  
824 *expression analysis based on the negative binomial distribution* (1.26.0) [Computer  
825 software]. Bioconductor version: Release (3.10).  
826 <https://doi.org/10.18129/B9.bioc.DESeq2>
- 827 Luque, E. M., Gutiérrez, G., Navarro-Sampedro, L., Olmedo, M., Rodríguez-Romero, J., Ruger-  
828 Herreros, C., Tagua, V. G., & Corrochano, L. M. (2012). A Relationship between  
829 Carotenoid Accumulation and the Distribution of Species of the Fungus *Neurospora* in  
830 Spain. *PLOS ONE*, 7(3), e33658. <https://doi.org/10.1371/journal.pone.0033658>
- 831 Lustenhouwer, N., Maynard, D. S., Bradford, M. A., Lindner, D. L., Oberle, B., Zanne, A. E., &  
832 Crowther, T. W. (2020). A trait-based understanding of wood decomposition by fungi.  
833 *Proceedings of the National Academy of Sciences*, 117(21), 11551–11558.  
834 <https://doi.org/10.1073/pnas.1909166117>
- 835 Maeda, K., Spor, A., Edel-Hermann, V., Heraud, C., Breuil, M.-C., Bizouard, F., Toyoda, S.,  
836 Yoshida, N., Steinberg, C., & Philippot, L. (2015). N<sub>2</sub>O production, a widespread trait  
837 in fungi. *Scientific Reports*, 5(1), 9697. <https://doi.org/10.1038/srep09697>
- 838 Malik, A. A., Martiny, J. B. H., Brodie, E. L., Martiny, A. C., Treseder, K. K., & Allison, S. D.  
839 (2020). Defining trait-based microbial strategies with consequences for soil carbon  
840 cycling under climate change. *The ISME Journal*, 14(1), 1–9.  
841 <https://doi.org/10.1038/s41396-019-0510-0>

## Mega-Fire Effect on Pyrophilous Microbes

- 842 Martin, M. (2011). Cutadapt removes adapter sequences from high-throughput sequencing reads.  
843 *EMBnet.Journal*, 17(1), 10–12. <https://doi.org/10.14806/ej.17.1.200>
- 844 Martiny, A. C., Treseder, K., & Pusch, G. (2013). Phylogenetic conservatism of functional traits  
845 in microorganisms. *The ISME Journal*, 7(4), 830–838.  
846 <https://doi.org/10.1038/ismej.2012.160>
- 847 Mc. Donald, J. H. (2015). *Handbook of Biological Statistics* (Third Edition). Sparky House  
848 Publishing.
- 849 McGee, P. A., Markovina, A.-L., Jeong, G. C. E., & Cooper, E. D. (2006). Trichocomaceae in  
850 bark survive high temperatures and fire. *FEMS Microbiology Ecology*, 56(3), 365–371.  
851 <https://doi.org/10.1111/j.1574-6941.2006.00079.x>
- 852 McMullan-Fisher, S. J. M., May, T. W., Robinson, R. M., Bell, T. L., Lebel, T., Catcheside, P.,  
853 & York, A. (2011). Fungi and fire in Australian ecosystems: A review of current  
854 knowledge, management implications and future directions. *Australian Journal of*  
855 *Botany*, 59(1), 70–90. <https://doi.org/10.1071/BT10059>
- 856 Meentemeyer, R. K., Rank, N. E., Shoemaker, D. A., Oneal, C. B., Wickland, A. C., Frangioso,  
857 K. M., & Rizzo, D. M. (2008). Impact of sudden oak death on tree mortality in the Big  
858 Sur ecoregion of California. *Biological Invasions*, 10(8), 1243–1255.  
859 <https://doi.org/10.1007/s10530-007-9199-5>
- 860 Metz, M. R., Varner, J. M., Frangioso, K. M., Meentemeyer, R. K., & Rizzo, D. M. (2013).  
861 Unexpected redwood mortality from synergies between wildfire and an emerging  
862 infectious disease. *Ecology*, 94(10), 2152–2159. <https://doi.org/10.1890/13-0915.1>
- 863 Meyers, K. J., Swiecki, T. J., & Mitchell, A. E. (2006). Understanding the Native Californian  
864 Diet: Identification of Condensed and Hydrolyzable Tannins in Tanoak Acorns

## Mega-Fire Effect on Pyrophilous Microbes

- 865 (Lithocarpus densiflorus). *Journal of Agricultural and Food Chemistry*, 54(20), 7686–  
866 7691. <https://doi.org/10.1021/jf061264t>
- 867 Moore, E. J. (1962). The Ontogeny of the Sclerotia of Pyronema Domesticum. *Mycologia*, 54(3),  
868 312–316. <https://doi.org/10.1080/00275514.1962.12025004>
- 869 Moser, B., & Wohlgemuth, T. (2006). Which plant species dominate early post-fire vegetation in  
870 the Central Alps, and why? *Forest Ecology and Management*, 234, S174.  
871 <https://doi.org/10.1016/j.foreco.2006.08.225>
- 872 Mukherjee, S., Mishra, A., & Trenberth, K. E. (2018). Climate Change and Drought: A  
873 Perspective on Drought Indices. *Current Climate Change Reports*, 4(2), 145–163.  
874 <https://doi.org/10.1007/s40641-018-0098-x>
- 875 Neary, D. G., Klopatek, C. C., DeBano, L. F., & Ffolliott, P. F. (1999). Fire effects on  
876 belowground sustainability: A review and synthesis. *Forest Ecology and Management*,  
877 122(1), 51–71. [https://doi.org/10.1016/S0378-1127\(99\)00032-8](https://doi.org/10.1016/S0378-1127(99)00032-8)
- 878 Nemergut, D. R., Knelman, J. E., Ferrenberg, S., Bilinski, T., Melbourne, B., Jiang, L., Violle,  
879 C., Darcy, J. L., Prest, T., Schmidt, S. K., & Townsend, A. R. (2016). Decreases in  
880 average bacterial community rRNA operon copy number during succession. *The ISME*  
881 *Journal*, 10(5), 1147–1156. <https://doi.org/10.1038/ismej.2015.191>
- 882 Nguyen, H. D. T., Nickerson, N. L., & Seifert, K. A. (2013). Basidioascus and Geminibasidium:  
883 A new lineage of heat-resistant and xerotolerant basidiomycetes. *Mycologia*, 105(5),  
884 1231–1250. <https://doi.org/10.3852/12-351>
- 885 Nguyen, N. H., Song, Z., Bates, S. T., Branco, S., Tedersoo, L., Menke, J., Schilling, J. S., &  
886 Kennedy, P. G. (2016). FUNGuild: An open annotation tool for parsing fungal

## Mega-Fire Effect on Pyrophilous Microbes

- 887 community datasets by ecological guild. *Fungal Ecology*, 20, 241–248.
- 888 <https://doi.org/10.1016/j.funeco.2015.06.006>
- 889 Oksanen, J. (2007). *vegan: Community Ecology Package. R package version 1.8-5*.
- 890 [https://www.semanticscholar.org/paper/vegan-%3A-Community-Ecology-Package.-R-](https://www.semanticscholar.org/paper/vegan-%3A-Community-Ecology-Package.-R-package-1.8-5-Oksanen/ce62be133614e05a8a63c39743e42a43765a5db0)
- 891 [package-1.8-5-Oksanen/ce62be133614e05a8a63c39743e42a43765a5db0](https://www.semanticscholar.org/paper/vegan-%3A-Community-Ecology-Package.-R-package-1.8-5-Oksanen/ce62be133614e05a8a63c39743e42a43765a5db0)
- 892 Paul Zinke. (1988). The Redwood Forest and Associated North Coast Forests. In *Terrestrial*
- 893 *Vegetation of California* (9th ed., pp. 679–698). California Native Plant Society.
- 894 Pausas, J. G., Bradstock, R. A., Keith, D. A., & Keeley, J. E. (2004). Plant Functional Traits in
- 895 Relation to Fire in Crown-Fire Ecosystems. *Ecology*, 85(4), 1085–1100.
- 896 <https://doi.org/10.1890/02-4094>
- 897 Pérez-Valera, E., Verdú, M., Navarro-Cano, J. A., & Goberna, M. (2018). Resilience to fire of
- 898 phylogenetic diversity across biological domains. *Molecular Ecology*, 27(13), 2896–
- 899 2908. <https://doi.org/10.1111/mec.14729>
- 900 Pérez-Valera, E., Verdú, M., Navarro-Cano, J. A., & Goberna, M. (2020). Soil microbiome
- 901 drives the recovery of ecosystem functions after fire. *Soil Biology and Biochemistry*, 149,
- 902 107948. <https://doi.org/10.1016/j.soilbio.2020.107948>
- 903 Petersen, P. M. (1970). Danish fireplace fungi-an ecological investigation on fungi on burns.
- 904 *Dansk Botanisk Arkiv*, 27(3), 1–97.
- 905 Potter, C. (2016). Landscape Patterns of Burn Severity in the Soberanes Fire of 2016. *Journal of*
- 906 *Geography & Natural Disasters*, s6. <https://doi.org/10.4172/2167-0587.S6-005>
- 907 Pressler, Y., Moore, J. C., & Cotrufo, M. F. (2019). Belowground community responses to fire:
- 908 Meta-analysis reveals contrasting responses of soil microorganisms and mesofauna.
- 909 *Oikos*, 128(3), 309–327. <https://doi.org/10.1111/oik.05738>



## Mega-Fire Effect on Pyrophilous Microbes

- 910 Pulido-Chavez, M. F., Alvarado, E. C., DeLuca, T. H., Edmonds, R. L., & Glassman, S. I.  
911 (2021). High-severity wildfire reduces richness and alters composition of  
912 ectomycorrhizal fungi in low-severity adapted ponderosa pine forests. *Forest Ecology  
913 and Management*, 485, 118923. <https://doi.org/10.1016/j.foreco.2021.118923>
- 914 R Core Team. (2020). *R: A Language and Environment for Statistical Computing*. R Foundation  
915 for Statistical Computing. <https://www.R-project.org/>
- 916 Raudabaugh, D. B., Matheny, P. B., Hughes, K. W., Iturriaga, T., Sargent, M., & Miller, A. N.  
917 (2020). Where are they hiding? Testing the body snatchers hypothesis in pyrophilous  
918 fungi. *Fungal Ecology*, 43, 100870. <https://doi.org/10.1016/j.funeco.2019.100870>
- 919 Reazin, C., Morris, S., Smith, J. E., Cowan, A. D., & Jumpponen, A. (2016). Fires of differing  
920 intensities rapidly select distinct soil fungal communities in a Northwest US ponderosa  
921 pine forest ecosystem. *Forest Ecology and Management*, 377, 118–127.  
922 <https://doi.org/10.1016/j.foreco.2016.07.002>
- 923 Reich, P. B. (2014). The world-wide ‘fast–slow’ plant economics spectrum: A traits manifesto.  
924 *Journal of Ecology*, 102(2), 275–301. <https://doi.org/10.1111/1365-2745.12211>
- 925 Riah-Anglet, W., Trinsoutrot-Gattin, I., Martin-Laurent, F., Laroche-Ajzenberg, E., Norini, M.-  
926 P., Latour, X., & Laval, K. (2015). Soil microbial community structure and function  
927 relationships: A heat stress experiment. *Applied Soil Ecology*, 86, 121–130.  
928 <https://doi.org/10.1016/j.apsoil.2014.10.001>
- 929 Richter, S., & Barnard, J. (2002). The radiation resistance of ascospores and sclerotia of  
930 *Pyronema domesticum*. *Journal of Industrial Microbiology and Biotechnology*, 29(2),  
931 51–54. <https://doi.org/10.1038/sj.jim.7000267>

## Mega-Fire Effect on Pyrophilous Microbes

- 932 Rogers, B. M., Neilson, R. P., Drapek, R., Lenihan, J. M., Wells, J. R., Bachelet, D., & Law, B.  
933 E. (2011). Impacts of climate change on fire regimes and carbon stocks of the U.S.  
934 Pacific Northwest. *Journal of Geophysical Research*, 116(G3).  
935 <https://doi.org/10.1029/2011JG001695>
- 936 Schoch, C. L., Seifert, K. A., Huhndorf, S., Robert, V., Spouge, J. L., Levesque, C. A., Chen, W.,  
937 & Consortium, F. B. (2012). Nuclear ribosomal internal transcribed spacer (ITS) region  
938 as a universal DNA barcode marker for Fungi. *Proceedings of the National Academy of*  
939 *Sciences*, 109(16), 6241–6246. <https://doi.org/10.1073/pnas.1117018109>
- 940 Seaver, F. J. (1909). Studies in Pyrophilous Fungi—I. The Occurrence and Cultivation of  
941 *Pyronema*. *Mycologia*, 1(4), 131–139. <https://doi.org/10.1080/00275514.1909.12020584>
- 942 Semenova-Nelsen, T. A., Platt, W. J., Patterson, T. R., Huffman, J., & Sikes, B. A. (2019).  
943 Frequent fire reorganizes fungal communities and slows decomposition across a  
944 heterogeneous pine savanna landscape. *New Phytologist*, 224(2), 916–927.  
945 <https://doi.org/10.1111/nph.16096>
- 946 Shivlata, L., & Tulasi, S. (2015). Thermophilic and alkaliphilic Actinobacteria: Biology and  
947 potential applications. *Frontiers in Microbiology*, 6.  
948 <https://doi.org/10.3389/fmicb.2015.01014>
- 949 Simler, A. B., Metz, M. R., Frangioso, K. M., Meentemeyer, R. K., & Rizzo, D. M. (2018).  
950 Novel disturbance interactions between fire and an emerging disease impact survival and  
951 growth of resprouting trees. *Ecology*, 99(10), 2217–2229.  
952 <https://doi.org/10.1002/ecy.2493>

## Mega-Fire Effect on Pyrophilous Microbes

- 953 Smith, D. P., & Peay, K. G. (2014). Sequence Depth, Not PCR Replication, Improves Ecological  
954 Inference from Next Generation DNA Sequencing. *PLOS ONE*, *9*(2), e90234.  
955 <https://doi.org/10.1371/journal.pone.0090234>
- 956 Smith, M. E., Henkel, T. W., & Rollins, J. A. (2015). How many fungi make sclerotia? *Fungal*  
957 *Ecology*, *13*, 211–220. <https://doi.org/10.1016/j.funeco.2014.08.010>
- 958 Spyros, V., Bourgeron, P. S., & Ghil, M. (2007). Development at the wildland–urban interface  
959 and the mitigation of forest–fire risk. *Proceedings of the National Academy of Sciences*,  
960 *104*(36), 14272–14276. <https://doi.org/10.1073/pnas.0704488104>
- 961 Stamatakis, A. (2014). RAxML version 8: A tool for phylogenetic analysis and post-analysis of  
962 large phylogenies. *Bioinformatics*, *30*(9), 1312–1313.  
963 <https://doi.org/10.1093/bioinformatics/btu033>
- 964 Steindorff, A. S., Carver, A., Calhoun, S., Stillman, K., Liu, H., Lipzen, A., He, G., Yan, M.,  
965 Pangilinan, J., LaButti, K., Ng, V., Bruns, T. D., & Grigoriev, I. V. (2020). Comparative  
966 genomics of pyrophilous fungi reveals a link between fire events and developmental  
967 genes. *Environmental Microbiology*, *n/a*(n/a). <https://doi.org/10.1111/1462-2920.15273>
- 968 Stephens, S. L., Burrows, N., Buyantuyev, A., Gray, R. W., Keane, R. E., Kubian, R., Liu, S.,  
969 Seijo, F., Shu, L., Tolhurst, K. G., & Wagtenonk, J. W. van. (2014). Temperate and  
970 boreal forest mega-fires: Characteristics and challenges. *Frontiers in Ecology and the*  
971 *Environment*, *12*(2), 115–122. <https://doi.org/10.1890/120332>
- 972 Stephens, S. L., Martin, R. E., & Clinton, N. E. (2007). Prehistoric fire area and emissions from  
973 California’s forests, woodlands, shrublands, and grasslands. *Forest Ecology and*  
974 *Management*, *251*(3), 205–216. <https://doi.org/10.1016/j.foreco.2007.06.005>

## Mega-Fire Effect on Pyrophilous Microbes

- 975 Van der Heijden, M. G. A. V. D., Bardgett, R. D., & Straalen, N. M. V. (2008). The unseen  
976 majority: Soil microbes as drivers of plant diversity and productivity in terrestrial  
977 ecosystems. *Ecology Letters*, *11*(3), 296–310. [https://doi.org/10.1111/j.1461-](https://doi.org/10.1111/j.1461-0248.2007.01139.x)  
978 [0248.2007.01139.x](https://doi.org/10.1111/j.1461-0248.2007.01139.x)
- 979 Vogl, R. J., & Schorr, P. (1972). Fire and Manzanita Chaparral in the San Jacinto Mountains,  
980 California. *Ecology*, *53*(6), 1179–1188. <https://doi.org/10.2307/1935432>
- 981 Wang, X.-H., Huhtinen, S., & Hansen, K. (2016). Multilocus phylogenetic and coalescent-based  
982 methods reveal dilemma in generic limits, cryptic species, and a prevalent  
983 intercontinental disjunct distribution in *Geopyxis* (Pyronemataceae s. L., Pezizomycetes).  
984 *Mycologia*, *108*(6), 1189–1215. <https://doi.org/10.3852/16-100>
- 985 Warcup, J. H., & Baker, K. F. (1963). Occurrence of Dormant Ascospores in Soil. *Nature*,  
986 *197*(4874), 1317–1318. <https://doi.org/10.1038/1971317a0>
- 987 Westerling, A. L., Hidalgo, H. G., Cayan, D. R., & Swetnam, T. W. (2006). Warming and Earlier  
988 Spring Increase Western U.S. Forest Wildfire Activity. *Science*, *313*(5789), 940–943.  
989 <https://doi.org/10.1126/science.1128834>
- 990 White, T. J., Bruns, T., Lee, S., & Taylor, J. (1990). AMPLIFICATION AND DIRECT  
991 SEQUENCING OF FUNGAL RIBOSOMAL RNA GENES FOR PHYLOGENETICS.  
992 In *PCR Protocols* (pp. 315–322). Elsevier. [https://doi.org/10.1016/B978-0-12-372180-](https://doi.org/10.1016/B978-0-12-372180-8.50042-1)  
993 [8.50042-1](https://doi.org/10.1016/B978-0-12-372180-8.50042-1)
- 994 Whitman, T., Whitman, E., Woolet, J., Flannigan, M. D., Thompson, D. K., & Parisien, M.-A.  
995 (2019). Soil bacterial and fungal response to wildfires in the Canadian boreal forest  
996 across a burn severity gradient. *Soil Biology and Biochemistry*, *138*, 107571.  
997 <https://doi.org/10.1016/j.soilbio.2019.107571>

## Mega-Fire Effect on Pyrophilous Microbes

- 998 Whittaker, R. H. (1965). Dominance and Diversity in Land Plant Communities: Numerical  
999 relations of species express the importance of competition in community function and  
1000 evolution. *Science*, *147*(3655), 250–260. <https://doi.org/10.1126/science.147.3655.250>
- 1001 Wickham, H., Averick, M., Bryan, J., Chang, W., McGowan, L. D., François, R., Grolemund,  
1002 G., Hayes, A., Henry, L., Hester, J., Kuhn, M., Pedersen, T. L., Miller, E., Bache, S. M.,  
1003 Müller, K., Ooms, J., Robinson, D., Seidel, D. P., Spinu, V., ... Yutani, H. (2019).  
1004 Welcome to the Tidyverse. *Journal of Open Source Software*, *4*(43), 1686.  
1005 <https://doi.org/10.21105/joss.01686>
- 1006 Wickham, H., Chang, W., Henry, L., Pedersen, T. L., Takahashi, K., Wilke, C., Woo, K., Yutani,  
1007 H., & RStudio. (2019). *ggplot2: Create Elegant Data Visualisations Using the Grammar*  
1008 *of Graphics* (3.2.1) [Computer software]. <https://CRAN.R-project.org/package=ggplot2>
- 1009 Willing, C. E., Pierroz, G., Coleman-Derr, D., & Dawson, T. E. (2020). The generalizability of  
1010 water-deficit on bacterial community composition; Site-specific water-availability  
1011 predicts the bacterial community associated with coast redwood roots. *Molecular*  
1012 *Ecology*, *n/a*(*n/a*). <https://doi.org/10.1111/mec.15666>
- 1013 Woolet, J., & Whitman, T. (2020). Pyrogenic organic matter effects on soil bacterial community  
1014 composition. *Soil Biology and Biochemistry*, *141*, 107678.  
1015 <https://doi.org/10.1016/j.soilbio.2019.107678>
- 1016 Yang, T., Tedersoo, L., Lin, X., Fitzpatrick, M. C., Jia, Y., Liu, X., Ni, Y., Shi, Y., Lu, P., Zhu,  
1017 J., & Chu, H. (2020). Distinct fungal successional trajectories following wildfire between  
1018 soil horizons in a cold-temperate forest. *New Phytologist*, *227*(2), 572–587.  
1019 <https://doi.org/10.1111/nph.16531>

## Mega-Fire Effect on Pyrophilous Microbes

- 1020 Yoon, J.-H., Kim, I.-G., Shin, Y.-K., & Park, Y.-H. (2005). Proposal of the genus  
1021 *Thermoactinomyces* sensu stricto and three new genera, *Laceyella*,  
1022 *Thermoflavimicrobium* and *Seinonella*, on the basis of phenotypic, phylogenetic and  
1023 chemotaxonomic analyses. *International Journal of Systematic and Evolutionary*  
1024 *Microbiology*, 55(1), 395–400. <https://doi.org/10.1099/ijms.0.63203-0>  
1025

## Enright et al Figure Captions

### Figure Captions

Figure 1: A) Map of the Soberanes Fire of 2016 with fire perimeter in orange. Triangles represent locations of individual plots in the plot network that were sampled in 2013 with burned plots in red and unburned plot in blue. B) Sampling scheme used in all plots with soils collected at 2, 6, and 10 meters from the plot center in each cardinal direction (indicated by inverted blue triangles on sampling scheme).

Figure 2: Fire reduced bacterial (A) total richness and (B) mean per sample richness in burned plots and fungal (C) total richness and (D) mean per sample richness in burned plots. Species accumulation curves represent total pre- and post-fire bacterial and fungal OTUs within the burned plots with transparency around the line representing the standard deviation. Mean per sample richness shown plus and minus the standard error. Colors differentiate sampling in 2013 pre-fire and in 2016 immediately post-fire. Shapes differentiate burned (plots 601 and 603) and unburned plots (plot 58). Statically significant difference in richness was tested using ANOVA (for burned plots,  $F_{1,1} = 65.73$ ,  $p < 0.001$ , for unburned  $F_{1,1} = 0.005$ ,  $p = 0.943$ ). Letters represent Tukey HSD differences.

Figure 3: NMDS of Bray-Curtis Dissimilarity ordinations comparing bacterial composition A) in unburned plot and B) burned plots and fungal composition in C) unburned plot and D) burned plots with colors indicating the 2013 pre-fire and 2016 post-fire samplings shapes differentiating burned and unburned plots. Ellipses represent 95% confidence interval from the centroid for each group. Notice the difference in scales for all NMDS with much smaller scales for NMDS axes in

unburned plots representing a much smaller degree of compositional turnover than for burned plots with much larger axes. Adonis  $R^2$  and p-values represent the difference in composition for pre- versus post-fire. Envfit model depicts which taxa are driving the changes in community composition for B) bacterial or D) fungal communities. The top phyla contributing to change are shown. Identification of the top contributors was done by  $R^2$  value after constraining p value at less than 0.001 and adjusted p -value to less than 0.01.

Figure 4: Rank abundance curves of taxa  $\geq 1\%$  sequence abundant for bacteria and fungi pre-fire (top) vs. post-fire (bottom) grouped by genus and colored by phyla. Where genus level identification could not be determined, a higher order of classification is given.

Figure 5: Circular phylogeny of all bacterial OTUs observed based on 16S rRNA. Consensus Lineage refers to the response to fire as measured using DeSEQ2 analysis. Lineages are colored based on positive (blue) or negative (orange) response to fire. The colored bars circling the outside of the phylogeny correspond to each OTUs respective phyla.

Figure 6: Circular phylogeny of all fungal OTUs observed based on ITS1. Consensus Lineage refers to the response to fire as measured using DeSEQ2 analysis. Lineages are colored based on positive (blue) or negative (orange) response to fire. The colored bars circling the outside of the phylogeny correspond to each OTUs respective class.

Figure 7: Conceptual model of hypothesized trait suites for post fire microbes, in comparison to analogous trait suits of fire adaptation in plants. Grimes CSR ecological trade-off directions are



placed inside the triangle following where the corresponding pyrophilous microbial trait suite is hypothesized to relate. A color gradient between trait suites represents that these suites may not be exclusive but rather taxa may fall along a gradient between trait suites. A representation of the microbial trait is placed at each corner (Fast colonization = replicating bacteria, Thermotolerance = fungal sclerotium, Post-fire nutrient acquisition = colonized charcoal) along with an analogous plant trait representation (fast herbaceous growth, serotinous cone, root nodule forming post-fire colonizer, respectively). A brief description of the pyrophilous trait suites and hypothesized taxa placement is located on the right side of the figure.

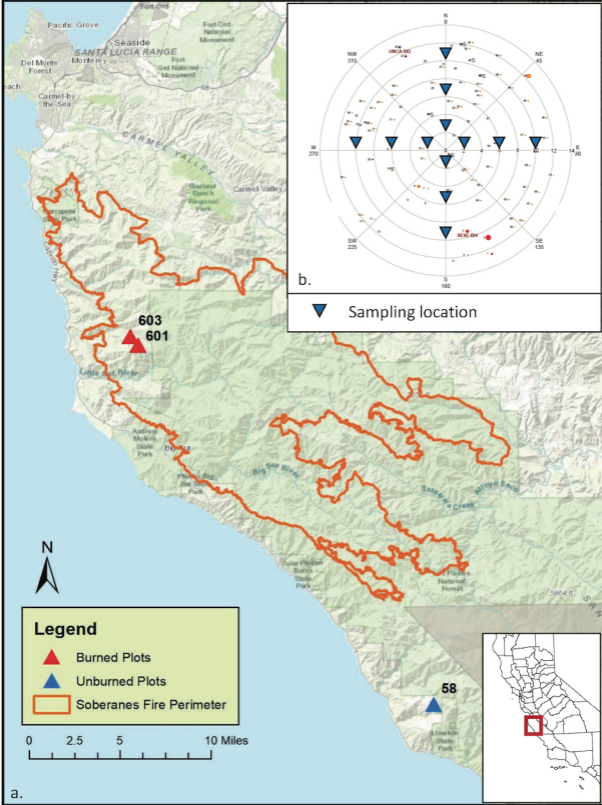

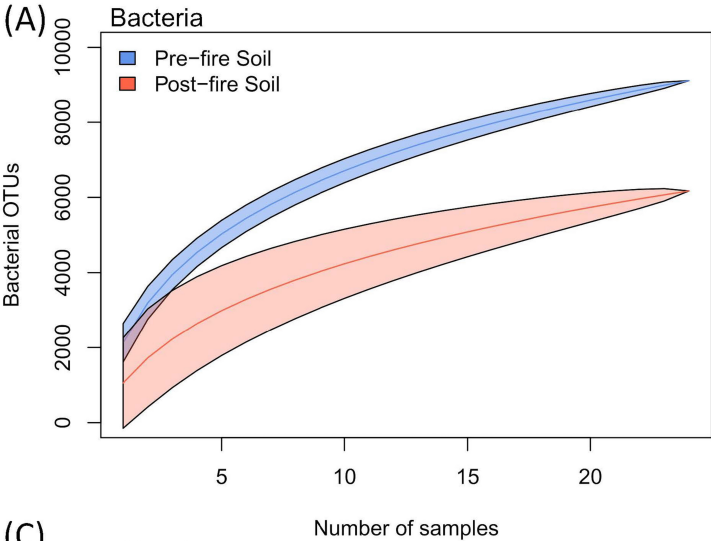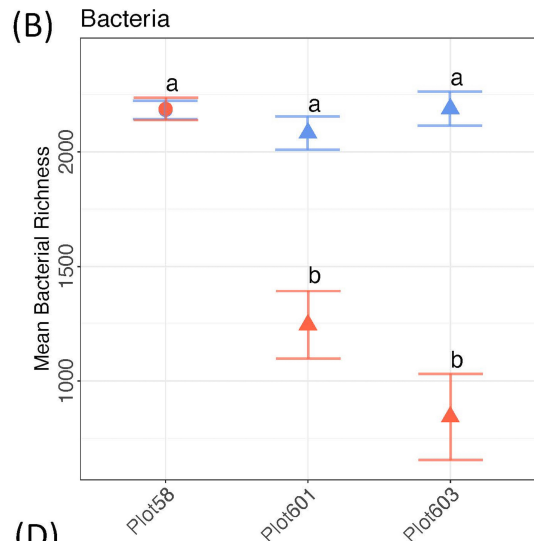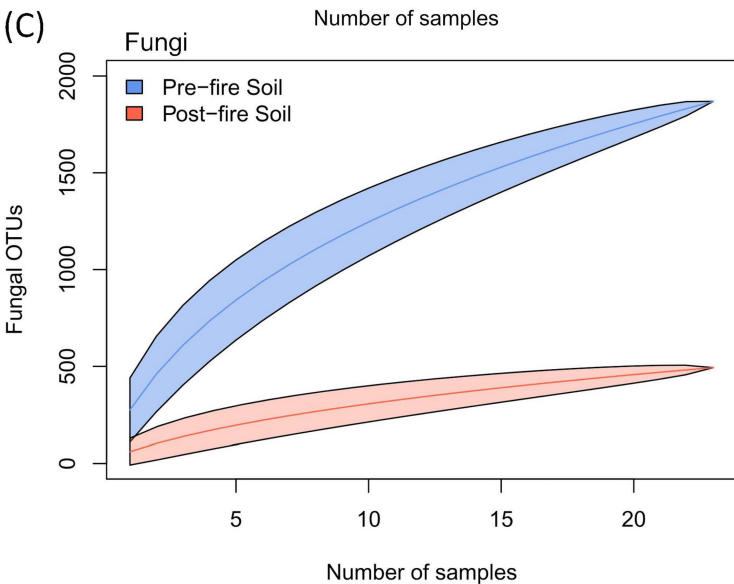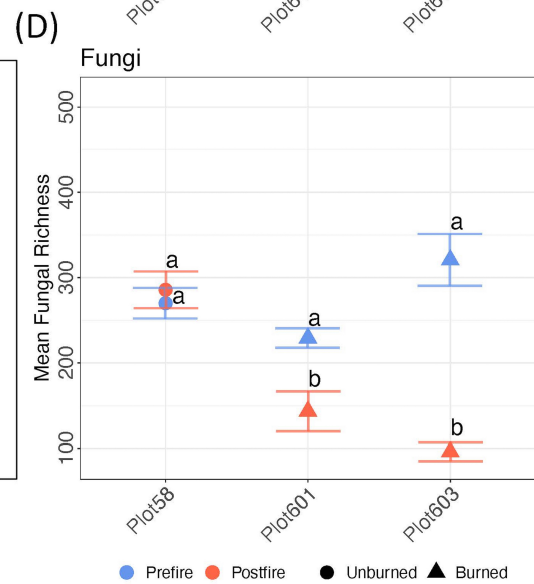

● Prefire ● Postfire ● Unburned ▲ Burned

(A) Unburned Bacteria

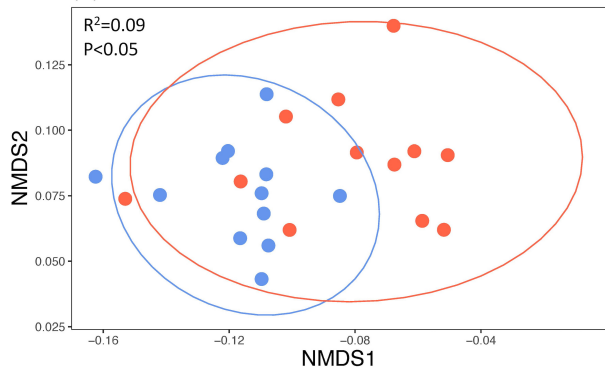

(B) Burned Bacteria

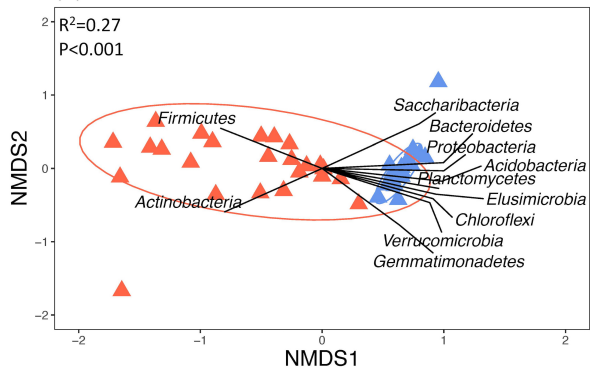

(C) Unburned Fungi

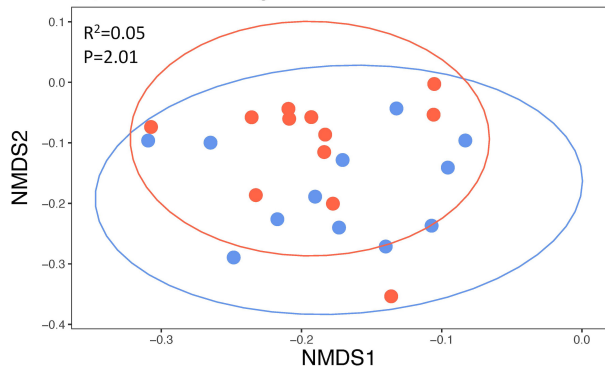

(D) Burned Fungi

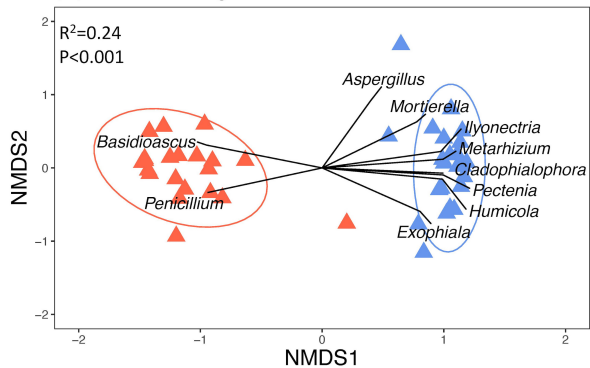

● Unburned ▲ Burned ● Pre-fire ● Post-fire

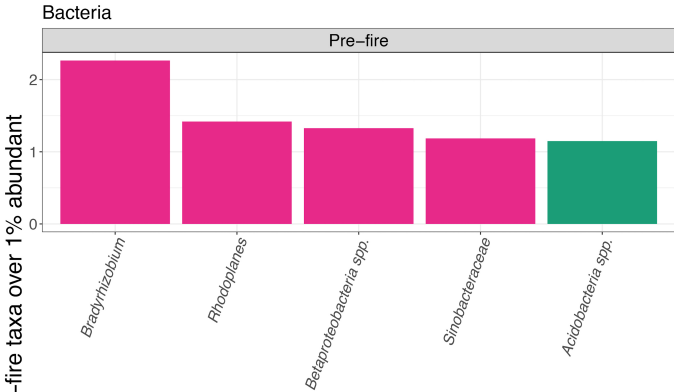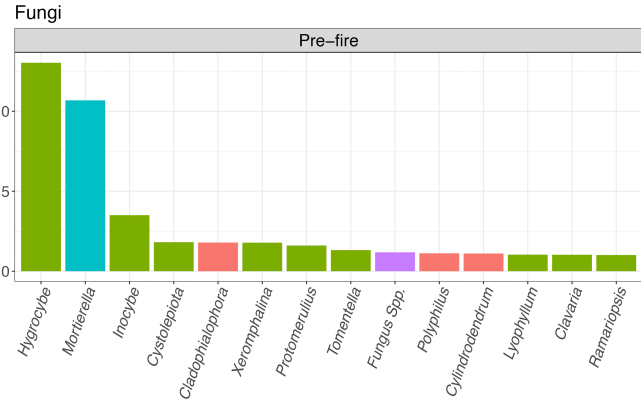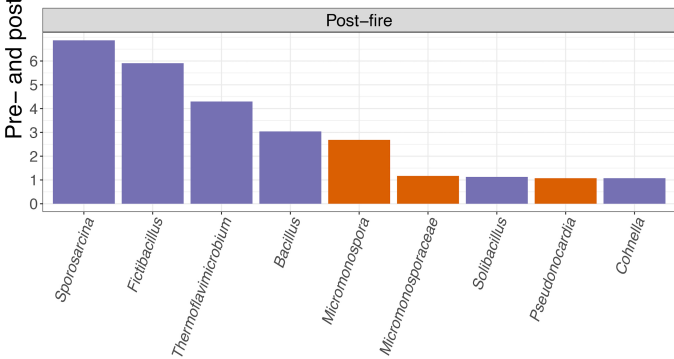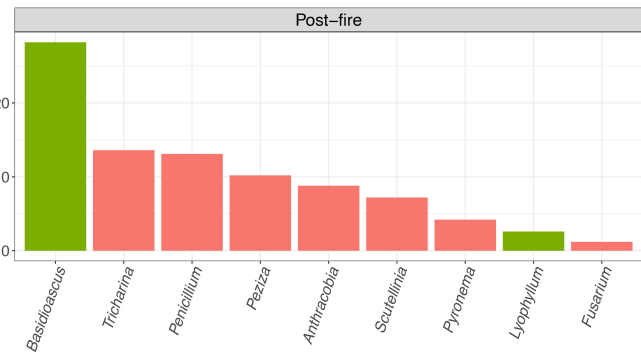

Phylum ■ Acidobacteria ■ Actinobacteria ■ Firmicutes ■ Proteobacteria

Phylum ■ Ascomycota ■ Basidiomycota ■ Mucoromycota ■ Unidentified

Tree scale: 0.1

**Phylum**

- Others
- Acidobacteria
- Actinobacteria
- Armatimonadetes
- Bacteroidetes
- Chloroflexi
- Elusimicrobia
- Firmicutes
- Gemmatimonadetes
- Gemmatimonadetes
- Planctomycetes
- Proteobacteria
- Verrucomicrobia
- WS3

**Consensus lineage**

- Positive
- Negative

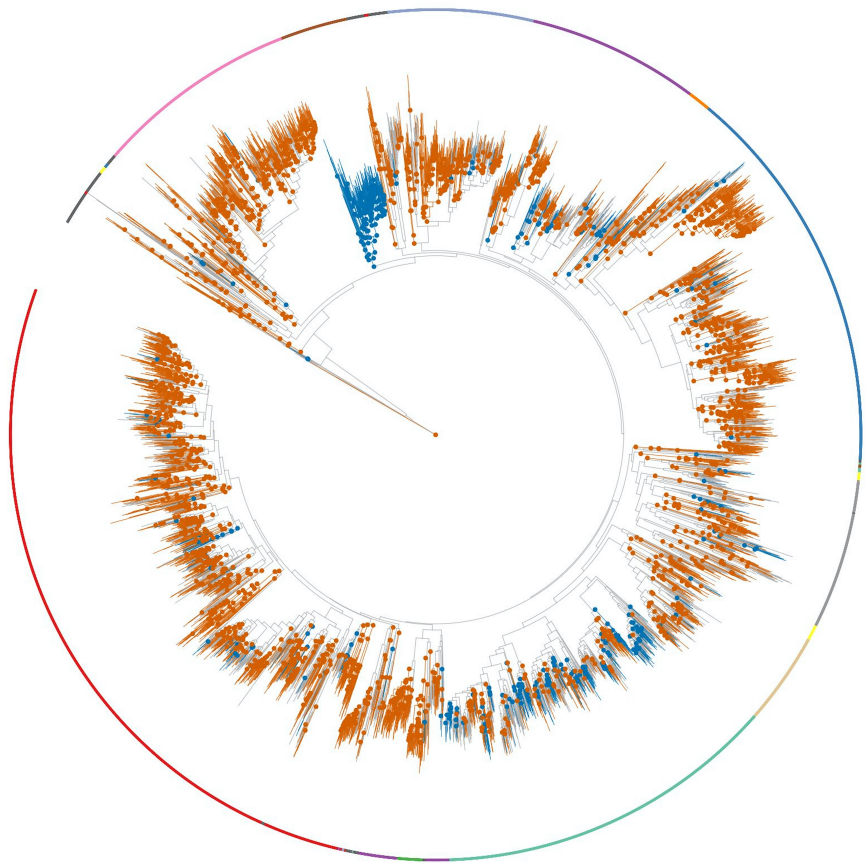

Tree scale: 0.1

**Class**

- Agaricomycetes
- Dothideomycetes
- Eurotiomycetes
- Geminibasidiomycetes
- Geoglossomycetes
- Glomeromycetes
- Lecanoromycetes
- Leotiomycetes
- Microbotryomycetes
- Mortierellomycetes
- Pezizomycetes
- Sordariomycetes
- Tremellomycetes
- Umbelopsidomycetes
- unidentified

**Consensus lineage**

- Positive
- Negative

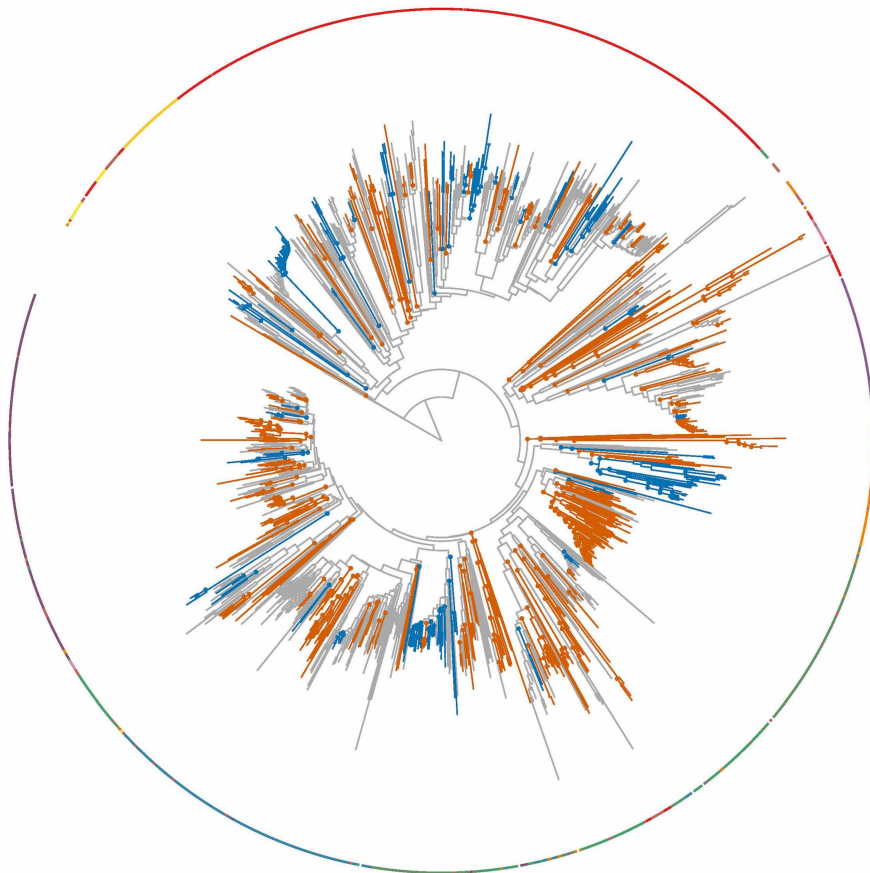

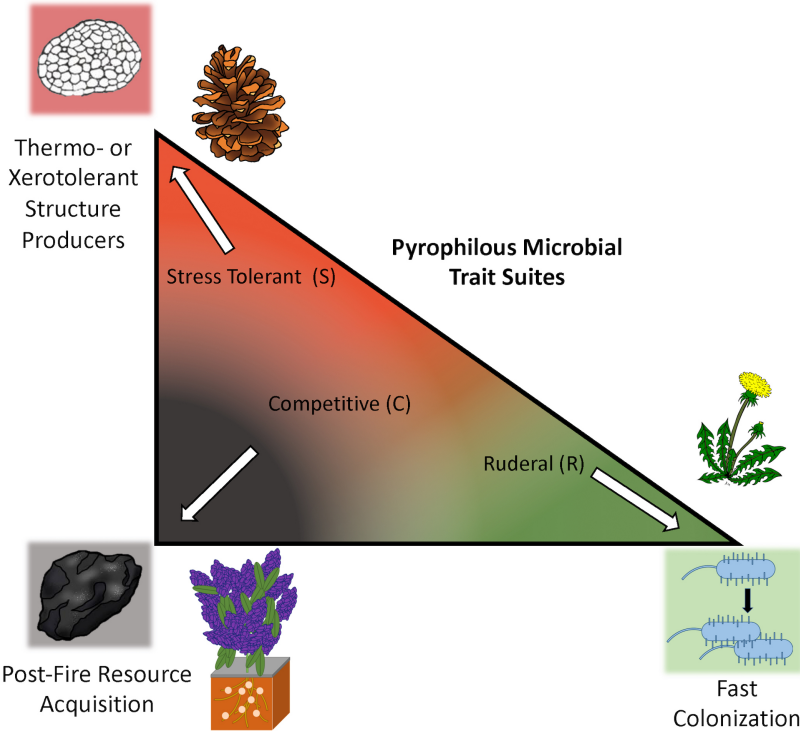

### Post-Fire Resource Acquisition

- Able to breakdown unique resources found after fire (eg. Pyrolyzed organic matter, high nitrogen)
- Able to withstand high pH of deposited ash
- Analogous to post-fire plants that capitalize on high nitrogen in burned soils (e.g. *Ceanothus*)
- Potential taxa:
  - Bacteria: *Arthrobacter*, *Nocardioides*
  - Fungi: *Lyophyllum atratum*, *Pholiota highlandensis*, *Penicillium chrysogenum*

### Thermo- or Xerotolerant Structure Producers

- Production of thermotolerant structures (e.g. fungal sclerotia, bacterial endospores)
- Analogous to plant production of thermotolerant structures (e.g. Serotinous cones or thick bark)
- Potential taxa:
  - Bacteria: *Thermoflavimicrobium*, *Bacillus*
  - Fungi: *Pyronema*, *Rhizopogon olivaceotinctus*, *Neurospora crassa*

### Fast Colonization

- Fast hyphal extension rates or low doubling time
- Rapid expansion into open niche space
- Analogous to plant vegetative re-sprouting and rapid colonization.
- Potential taxa:
  - Bacteria: *Massilia*
  - Fungi: *Basidioascus*, *Penicillium arenicola*, *Aspergillus*
